# 1 Synthesis and degradation of FtsZ determines the first cell division in 2 starved bacteria

3 Karthik Sekar<sup>1</sup>, Roberto Rusconi<sup>2,3</sup>, Tobias Fuhrer<sup>1</sup>, Elad Noor<sup>1</sup>, Jen Nguyen<sup>2,4</sup>, Vicente I.  
4 Fernandez<sup>2</sup>, Marieke F. Buffing<sup>1,5</sup>, Michael Berney<sup>6</sup>, Roman Stocker<sup>2</sup>, Uwe Sauer<sup>1,\*</sup>

5 <sup>1</sup>Institute of Molecular Systems Biology, Department of Biology, ETH Zurich, 8093 Zurich,  
6 Switzerland.

7 <sup>2</sup>Institute of Environmental Engineering, Department of Civil, Environmental and Geomatic  
8 Engineering, ETH Zurich, 8093 Zurich, Switzerland.

9 <sup>3</sup>Department of Biomedical Sciences, Humanitas University, 20090 Pieve Emanuele – Milan,  
10 Italy.

11 <sup>4</sup>Microbiology Graduate Program, Massachusetts Institute of Technology, Cambridge 02139,  
12 Massachusetts, USA.

13 <sup>5</sup>Life Science Zurich PhD Program on Systems Biology, 8057 Zurich, Switzerland.

14 <sup>6</sup>Department of Microbiology and Immunology, Albert Einstein College of Medicine, Bronx  
15 10461, New York, USA.

16 \*To whom correspondence should be addressed: sauer@imsb.biol.ethz.ch

17 **In natural environments, microbes are typically non-dividing. Such quiescent cells**  
18 **manage fleeting nutrients and gauge when intra- and extracellular resources permit**  
19 **division. Quantitative prediction of the division event as a function of nutritional status**  
20 **is currently achieved through phenomenological models for nutrient-rich, exponentially**  
21 **growing cultures. Such models, however, cannot predict the first division of cells under**  
22 **limiting nutrient availability. To address this, we analyzed the metabolic capability of**  
23 **starved *Escherichia coli* that were fed pulsed glucose at defined frequencies. Real-time**

24 **metabolomics and microfluidic single-cell microscopy revealed unexpected, rapid**  
25 **protein and nucleic acid synthesis already in non-dividing cells. Additionally, the lag**  
26 **time to first division shortened as pulsing frequency increased. Here, we demonstrate**  
27 **that the first division from a non-dividing state occurs when the facilitating protein FtsZ**  
28 **reaches division-supporting concentration. A dynamic model quantitatively relates lag**  
29 **time to FtsZ synthesis from nutrient pulses and its protease-dependent degradation.**  
30 **Consistent with model predictions, lag time shortened when FtsZ synthesis was**  
31 **supplemented or protease inhibitors were added. Lag time prolonged when *ftsZ* was**  
32 **repressed or FtsZ degradation rate was increased. Thus, we provide a basis to**  
33 **quantitatively predict bacterial division using information about molecular**  
34 **determinants and the nutrient input.**

## 35 **Main**

36 The division of one cell into two daughters is a key feature of life, and we understand many  
37 molecular processes that achieve this fundamental biological event in different cell types.  
38 Less clear is the exact molecular basis to initiate the division process, especially in relation to  
39 nutrient input. Nutrition-related cues proposed as decision signals include protein<sup>1</sup> or DNA<sup>2</sup>  
40 concentrations, and metabolites that interact with the division machinery<sup>3</sup>. Current models of  
41 bacterial division focus on exponential growth conditions<sup>4</sup> where nutrients are abundant.  
42 Typically, these models use phenomenological quantities such as biomass per cell as the  
43 decision input variable. For example, the adder model<sup>5,6</sup> accurately predicts that bacteria will  
44 divide after a constant amount of biomass addition after birth for exponential growth.  
45  
46 Before bacterial cultures can divide exponentially, individual cells must first make the  
47 decision for the initial division from a non-dividing state, the typical situation for microbes in  
48 their natural environment<sup>7</sup>. Moreover, in many environments, non-dividing microbes receive

49 nutrients only sporadically and in small quantities, such as in the gut<sup>8</sup>, soil<sup>7</sup>, ocean<sup>9</sup>, but often  
50 also in industrial fermentation processes<sup>10</sup>. The biomass per cell input variable is not  
51 sufficiently detailed to understand the decision process for the first cell division of a non-  
52 dividing state. Furthermore, the biosynthetic capabilities of starved cells are generally not  
53 well understood<sup>11</sup>. Hence, current models of cell division do not predict division timing for  
54 the widespread, naturally occurring sporadic nutrient conditions. Thus, open questions  
55 remain: How do cells decide the first division from a non-dividing state? Which molecular  
56 entities determine their decision?

57

58 Here, we studied the first division decision of starved *E. coli* under sporadic nutrient supply.  
59 We developed methodologies to measure division occurrence and metabolic activity of  
60 starved cells under sporadic pulsing. We found that cells rapidly synthesized proteins and  
61 nucleic acids from sporadic glucose. Additionally by quantifying division timing as a function  
62 of sporadic glucose pulse frequency, we deduced the FtsZ protein as the division determinant,  
63 built a quantitative model, and substantiated it with follow up experiments.

## 64 Results

### 65 The lag time to division shortens with glucose pulse frequency for a subpopulation

66 We developed three complementary systems (Fig. 1) – each with different advantages and  
67 providing robust cross-validation of each other – to controllably pulse nutrients to starved *E.*  
68 *coli* and measure division occurrence. Two of the systems (spin flask and plate reader) pulsed  
69 nutrients by dispensing a drop of defined volume at a programmed frequency to a starved  
70 culture. The drops were calibrated so that the final concentration, after the pulse mixed with  
71 the culture, was the same between the two systems. In the third system, bacteria attached to  
72 the bottom surface of a microfluidic chamber were suffused with flowed media and imaged

73 over time, while a pressure system controller allowed a precise and rapid switch of flowing  
74 medium and similarly provided nutrient pulses to the bacteria.

75

76 How does sporadic nutrient availability empirically relate to the division decision? We  
77 focused on the case of limiting carbon and energy with sporadic glucose pulses. Glucose  
78 grown cells were starved for 2 h and then pulsed at controlled frequencies of 10  $\mu$ M glucose  
79 with the spin flask and plate reader systems. Hereafter, we use the term time-integrated (TI)  
80 feedrate (abbreviated  $f$ , units: mmol glucose/g dry cell weight/hour) as the average rate of  
81 glucose fed over time normalized to the initial mass of cells in the culture. Our pulse  
82 frequency-modulated TI feedrates spanned the range from 0.1 mmol/g/h, which does not  
83 support division, to just above 1 mmol/g/h. All TI feedrates were well below the exponential  
84 growth consumption rate of *E. coli* ( $\sim 10$  mmol/g/h)<sup>12</sup>. The cultures were glucose limited  
85 throughout the experiments, as was verified by absent glucose accumulation after pulses  
86 ([Supplementary Table 1](#)). To assess division occurrence as a function of TI feedrate, we  
87 measured the optical density (OD). Strikingly, the transition (lag) time to cell division, i.e.,  
88 from constant to increasing OD, was dependent on pulsing frequency ([Fig. 2a](#) and  
89 [Supplementary Table 2](#)) and not explained by the total glucose fed ([Supplementary Figure 1](#)).  
90 At TI feedrates below  $\sim 0.2$  mmol/g/h (the critical rate), the OD did not increase within the  
91 first 6 hours of pulsing. Above  $\sim 0.2$  mmol/g/h, OD increase was only observed after a TI  
92 feedrate-dependent lag time from the start of pulsing ([Fig. 2a insets](#)). For TI feedrates above  
93  $\sim 1.0$  mmol/g/h, OD increased immediately without a detectable delay.

94

95 We confirmed that the OD increase reflects cell division by observing similar inflections in  
96 cell counts measured with flow cytometry occurring after lag times ([Fig. 2b](#)). Since the total  
97 glucose fed during the lag phase was calculated to be insufficient for the doubling of the

98 biomass of all cells in the culture ([Supplementary Table 2](#)), we expected the average cell to  
99 become smaller. Indeed, microscopy demonstrated that the average cell size decreased after  
100 the onset of cell division ([Fig. 2c](#)). Lastly, we used the microfluidic platform to similarly  
101 pulse feed cells and visually track division events ([Fig. 1a](#) and [Supplementary Video 1](#)).  
102 Consistent with our previous observations, division started after a lag time that shortened with  
103 increasing pulsing frequency ([Fig. 2d](#)).

104

105 We noticed that not more than ~65% of the cells divided within 5 h in the microfluidic  
106 experiments, suggesting potential population heterogeneity. Furthermore, the initial linear  
107 increase in OD flattened before the initial OD was fully doubled ([Supplementary Figure 3](#)).  
108 Both observations suggested that primarily a subpopulation undergoes the division. We  
109 hypothesized that this subset of cells were further along in the cell cycle before the start of  
110 pulsing compared to the rest. Therefore, we resolved the cell cycle status during pulsing by  
111 flow cytometric analysis of the DNA content distribution ([Fig. 2e](#)). Before pulsing, two  
112 subpopulations existed, one with low (1N) and one with double DNA per cell (2N), as  
113 previously observed for *E. coli* in stationary phase<sup>13</sup>. Upon glucose pulsing, the 2N cells  
114 disappeared while the 1N population increased. The 2N population was likely in the D period  
115 of the cell cycle<sup>7</sup>, with sufficient DNA for division but limited nutritionally. Counting both  
116 1N and 2N cells over time suggested that all division could be explained by 2N cells dividing  
117 into 1N ([Fig. 2f](#)).

118

### 119 [Pulsed glucose is used rapidly to synthesize biomass even without division](#)

120 How is pulse-fed carbon utilized during the lag phase? In principle, it could be consumed by  
121 non-growth related maintenance requirements<sup>14</sup> or stored for division. We defined  
122 maintenance as any consumed glucose not used directly for division, but rather for energetic

123 costs such as protein turnover and sustaining cell integrity. We wondered whether  
124 maintenance was equivalent to and explained the critical rate ( $\sim 0.2$  mmol/g/h), meaning that  
125 only fed glucose exceeding the maintenance could be utilized for division. We, therefore,  
126 decomposed the TI feedrate,  $f$ , into division and maintenance terms by assuming a linear  
127 dependence of the division rate ( $\Psi$ , units:  $1/h \cdot [\text{number of new and existing cells}/\text{number of}$   
128  $\text{existing cells}]$ ) on the TI feedrate<sup>15</sup> (Fig. 3). The division rate was almost directly proportional  
129 to the TI feedrate, suggesting that the required maintenance (i.e. the y-intercept) is less than  
130 the critical rate ( $\sim 0.2$  mmol/g/h) and generally too small for precise measurement, as seen  
131 before in carbon-limited batch culture<sup>16</sup>. We conclude that most carbon pulsed during lag is  
132 stored for eventual division and that the critical rate is not explained solely by maintenance  
133 requirement.

134

135 How do non-dividing cells process and potentially store sporadically pulsed carbon? To  
136 address this question we performed near real-time metabolomics at a resolution of 10–15 s  
137 during the glucose pulses<sup>17</sup>. A continuous sample pump circulated culture liquid and provided  
138 2  $\mu\text{L}$  of whole cells in medium to a flow injector with time-of-flight mass spectrometer. More  
139 than 100 different annotated metabolites were measured (Supplementary Table 1). We  
140 observed sharply defined pulse responses in the concentration of all detected central  
141 metabolic intermediates at TI feedrates of 0.06, 0.12, and 0.18 mmol/g/h (Fig. 4a and  
142 Supplementary Figure 4a) that did not support cell division (Fig. 2a). The concentration spike  
143 and the return to baseline levels within about 300 s strongly suggested that a wave of carbon  
144 rapidly flows through central metabolism. In sharp contrast, several building blocks of  
145 cellular biomass such as amino acids and nitrogen bases continuously increased between  
146 pulses and rapidly decreased immediately after each glucose pulse (Fig. 4a and  
147 Supplementary Figure 4b). Since these accumulated amino acids including phenylalanine

148 cannot be degraded by *E. coli*, their depletion suggested a brief increase in protein synthesis  
149 with each pulse<sup>18</sup> (Fig. 4b). The nitrogen bases, hypoxanthine and guanine, may be salvaged  
150 for new nucleic acid synthesis upon sudden access to carbon. These observations suggested  
151 that fed carbon rapidly sweeps through central metabolism into biosynthesis of amino acid  
152 and nucleotide monomers and leads to a period of increased protein and nucleic acid synthesis  
153 immediately after the glucose pulses, even in the absence of cell division. This observation  
154 echoed earlier work about net protein synthesis in lag phase before division<sup>19</sup>.

155

156 To confirm protein and nucleic acid synthesis from fed carbon in non-dividing cells, we  
157 repeated the glucose pulsing and blocked macromolecule synthesis by adding antibiotics one  
158 minute after the second pulse to curtail carbon to specific metabolic sectors (Fig. 4bc and  
159 Supplementary Figure 4c). Upon addition of the ribosomal inhibitor chloramphenicol, the  
160 depletion of five measured amino acids including glutamate and phenylalanine was slowed  
161 compared to addition of other antibiotics. Conversely, guanine but not the amino acids  
162 exhibited a similar effect upon challenge with rifamycin and azidothymidine, which limit  
163 RNA and DNA synthesis, respectively<sup>20</sup>. The DNA-specific nitrogen base thymine, as  
164 expected, accumulated only upon azidothymidine addition. To directly demonstrate  
165 incorporation of fed glucose into biomass macromolecules at non-division frequencies, we  
166 performed pulse experiments with uniformly labeled <sup>13</sup>C-glucose for 6 h. Increasing fractions  
167 of labeled threonine (M+4) and other amino acids in extracted and hydrolyzed protein  
168 confirmed *de novo* protein synthesis (Fig. 4d and Supplementary Table 3). Likewise,  
169 increasing labeled fractions of deoxyribose (M+5) from hydrolyzed DNA substantiated the  
170 use of pulsed carbon for *de novo* DNA synthesis (Fig. 4d) through the PRPP intermediate as  
171 shown previously<sup>17</sup>. Although glycogen is a storage form of glucose<sup>21</sup>, much less labeling was  
172 found in glycogen hydrolysate (Supplementary Table 3). Lastly, we tested whether

173 macromolecular synthesis occurred primarily in the 2N population using single cell  
174 microscopy under microfluidics with nutrient pulsing ([Supplementary Figure 6](#)). We  
175 separated populations of cells into dividing (all 2N) and non-dividing. Dividing cells  
176 synthesized more biomass and protein before division compared to non-dividing cells.  
177 Specifically, the cell elongation and GFP synthesis rates were higher in dividing cells  
178 (dividing cell extension rate of  $0.0086 \pm 0.0014$   $\mu\text{m}/\text{min}$ , dividing GFP synthesis rate of  
179  $9.2 \times 10^{-5} \pm 1.8 \times 10^{-5}$  Norm. GFP/min versus non-dividing cell extension rate of  $0.0033 \pm$   
180  $0.0013$   $\mu\text{m}/\text{min}$ , non-dividing GFP synthesis rate of  $6.7 \times 10^{-5} \pm 1.9 \times 10^{-5}$  Norm. GFP/min).  
181 Collectively, antibiotic challenges,  $^{13}\text{C}$ -labeling, and microfluidics support our hypothesis that  
182 fed carbon is assimilated into protein and nucleic acids in non-dividing cells during the lag  
183 phase.

184

#### 185 [FtsZ synthesis and degradation determines the division occurrence](#)

186 Next, we asked what determines division occurrence. We conjectured that a defined  
187 stoichiometry of key macromolecules (e.g. division proteins, DNA) commences the division  
188 event. Since pulse-fed glucose is converted into protein, RNA, and DNA in non-dividing  
189 cells, we posit that a specific macromolecule may stoichiometrically limit the division. Given  
190 that the lag time to the first division is a function of the pulse frequency, the most  
191 parsimonious explanation is that the limiting macromolecule(s) are synthesized after the pulse  
192 for a brief period and constitutively degraded ([Fig. 5](#)). This means that longer time between  
193 pulses results in more degradation and greater total glucose requirement to reach division,  
194 which is consistent with our data ([Supplementary Figure 1](#)). The competing synthesis and  
195 degradation also can explain the critical rate ( $\sim 0.2$  mmol/g/h); a critical rate would exist  
196 where the synthesis and degradation rates of the limiting entity are equal ( $f_3$  in [Fig. 5](#)). Since  
197 proteins are the most abundant macromolecules<sup>22</sup> and because their degradation kinetics are



198 consistent with the time scales observed<sup>23</sup>, we hypothesized that the limiting, determining  
199 entity is a degraded protein. A key aspect of this theory is amenable to experimental  
200 validation: the lag time should be reduced by abrogating protein degradation with chemical  
201 protease inhibitors. Specifically, we added a cocktail of protease inhibitors at the onset of  
202 pulse feeding, using  $f = 0.28$  mmol/g/h for which the usual lag time was about 200 min.  
203 Consistent with our hypothesis of continuous degradation of one or more proteins that limit  
204 division, treatment with protease inhibitors reduced the lag time by 30% (Fig. 6a).

205

206 To identify the putative division limiting protein for division, we considered the known set of  
207 degraded proteins in *E. coli*<sup>24,25</sup>, approximately 7% of the proteome. When we intersected the  
208 degrading protein set to the set of proteins involved in cell division<sup>26</sup>, only FtsN and FtsZ  
209 remained (Fig. 6b). Given that FtsN has very low abundance of around 100 copies per cell<sup>27</sup>,  
210 we focused on FtsZ. FtsZ forms the division ring that septates a mother cell into two  
211 daughters<sup>28</sup>. FtsZ is transcriptionally repressed by PdhR<sup>29</sup>, which is activated by the global  
212 transcriptional regulator Crp-cAMP<sup>30</sup> (Fig. 6c). Since Crp-cAMP regulation is highly active  
213 during carbon starvation in *E. coli*<sup>31</sup>, one would expect *ftsZ* to be repressed during starvation  
214 and in the lag phase. Indeed, genetic disruption of *ftsZ* repression by deleting *crp* or *pdhR*  
215 entirely abrogated the non-division phase, as cells divided without lag upon pulsing  
216 (Supplementary Figure 7). These results suggest that FtsZ limits division and is synthesized  
217 during each pulse while being continuously degraded until its concentration reaches a level  
218 that supports division (Fig. 6c inset). We tested the plausibility of this hypothesis by  
219 developing an approximate, smoothed dynamic model:

$$\frac{d[\text{FtsZ}]}{dt} = \alpha_0 + \alpha_1 f - \frac{V_{max}[\text{FtsZ}]}{K_m + [\text{FtsZ}]}$$

220 The model accounts for the basal synthesis ( $\alpha_0$ ), pulsing-dependent synthesis ( $\alpha_{1f}$ ), and  
221 degradation (the Michaelis-Menten term) of FtsZ. We parameterized the model based on  
222 literature values mostly specific to FtsZ, the strain, and the media used<sup>23,27,32</sup> ([Supplementary](#)  
223 [Information](#)). Despite fitting just a single parameter  $\alpha_1$ , the model reproduced non-zero lag  
224 times remarkably well ( $R^2 = 0.86$ ), supporting the role of FtsZ as the limiting entity for  
225 division ([Fig. 6d](#)).

226

227 Our model postulates that FtsZ abundance depletes monotonically during starvation and  
228 increases upon glucose pulsing. Since resolving FtsZ abundance changes within a single pulse  
229 interval requires intractable sensitivity (FtsZ abundance changes ~1% between pulses,  
230 [Supplementary Information](#)), we monitored FtsZ abundance changes over longer periods with  
231 immunoblotting. Pulsing for 16 h at non-division inducing TI feedrates yields several-fold  
232 higher FtsZ concentrations compared to 16 h starvation ([Supplementary Figure 8](#)), confirming  
233 that FtsZ is indeed one of the proteins synthesized from the glucose pulses under starvation.  
234 Genetic deletion of *clpX* or *clpP* similarly increased FtsZ concentrations even under full  
235 starvation, confirming *in vivo* that the ClpXP protease complex degrades FtsZ during glucose  
236 starvation. This result is consistent with earlier *in vitro* evidence for ClpXP-based degradation  
237 of FtsZ<sup>32</sup>.

238

239 Observed synthesis and degradation of FtsZ alone, however, cannot establish division  
240 determinacy because many proteins are likely synthesized with glucose pulses and degraded.  
241 Instead, the model proffered clear, falsifying experiments to test FtsZ's candidacy as the  
242 limiting entity. We first titrated FtsZ synthesis, in effect modulating specific parameters while  
243 holding initial/division conditions, TI feedrate, and other parameters. At a TI feedrate of 0.38  
244 mmol/g/h, a mutant strain with *pdhR* deletion that lacked FtsZ transcriptional repression

245 divided without a lag phase, but the lag phase was gradually restored upon plasmid-based  
246 expression of PdhR (decreasing  $\alpha_0$  and  $\alpha_1$ ) (Fig. 6e). Similarly, direct plasmid-based  
247 supplementation of FtsZ (increasing  $\alpha_0$  and  $\alpha_1$ ) in the wild-type reduced the lag time with  
248 increasing induction levels for a given TI feedrate (Fig. 6f). The causal role of protein  
249 degradation was tested by modulating the FtsZ degradation rate through plasmid-based  
250 overexpression of ClpX. ClpX abundance is known to be rate-limiting for ClpXP-based  
251 degradation<sup>33</sup>; therefore, supplemented ClpX should increase the FtsZ degradation rate  
252 (increasing  $V_{\max}$ ). Consistent with our hypothesis, lag times prolonged at a given TI feedrate  
253 with increasing ClpX expression in *E. coli* (Fig. 6g). We conclude that all titration  
254 experiments affecting the synthesis and degradation parameters are consistent with FtsZ  
255 division determinacy.

256

257 To exclude the possibility that also other division proteins are limiting, we titrated FtsA, FtsB,  
258 FtsL, and FtsN (Supplementary Figure 9). Overexpression of the former three did not affect  
259 the lag time, but at the highest induction level FtsB and FtsL increased the division rate once  
260 the lag time ended. FtsN overexpression exhibited a more complex phenotype. While the  
261 highest induction level appeared to reduce the lag time, it also had a deleterious effect  
262 resulting in only a small increase in OD, and thus presumably division of only very few cells.  
263 FtsN cannot, therefore, be the sole limiting factor. The reduced lag with supplemented FtsN  
264 may be explained by a population minority where FtsZ abundance is enough and FtsN is  
265 limiting. Alternatively, supplemental FtsN could affect FtsZ polymerization, degradation, or  
266 the separation of cell<sup>34</sup>, thus affect lag through the FtsZ determinacy model. We conclude that  
267 the negative controls do not falsify the FtsZ determinacy model, but other division proteins  
268 may influence division through their interaction with FtsZ<sup>35</sup> or may potentially be limiting in  
269 a smaller fraction of cells where FtsZ is abundant enough.

270

271 Finally, we wondered whether FtsZ-limited division is specific to pulsed glucose or a more  
272 general mechanism that links the nutritional status to the first cell division. For this purpose,  
273 we tested the influence of FtsZ overexpression on the lag phase upon pulsing carbon-starved  
274 *E. coli* with the gluconeogenic carbon sources glycerol and acetate and nitrogen-starved cells  
275 with the nitrogen source ammonium (Supplementary Figure 10). In all cases, FtsZ  
276 overexpression reduced the lag phase akin to the glucose case. Thus, our results suggest that  
277 the balance between FtsZ synthesis and protease-mediated degradation is a general control  
278 mechanism for the first cell division during sporadic nutrient availability for a variety of  
279 different nutrients.

280

## 281 Discussion

282 The rapid, untrammelled biomass synthesis in non-dividing, starved cells surprised us. Starved  
283 cells are expected to throttle metabolism and *de novo* biosynthesis (transcription, translation,  
284 and DNA replication) due to the stringent response effects<sup>11</sup> and, therefore, cease  
285 accumulating biomass<sup>36</sup>. Our expectation and the implicit one from earlier work anticipated  
286 that the metabolite pools must first replenish to continue the cell cycle and biosynthesis. Our  
287 measurements demonstrate that over a period of a few hours, glucose-starved *E. coli* maintain  
288 a high anabolic and catabolic capacity. Furthermore, measured central carbon metabolite  
289 pools recrudescence and deplete within seconds, meaning even minuscule glucose passes through  
290 quickly. The limitation for division occurred on the protein level and not a specific  
291 metabolite, echoing recent work that argues the protein production and not metabolic activity  
292 limits cell cycle progression<sup>37,38</sup>.

293

294 Additionally, we demonstrated that, under conditions of sporadically available nutrients, the  
295 dynamics of FtsZ concentration primarily determines the timing of first cell division in *E.*  
296 *coli*. The hypothesis that FtsZ concentration is a determinant of division has been proposed  
297 before<sup>1</sup>, but was rejected in experiments conducted under exponential growth conditions<sup>39,40</sup>,  
298 where glucose consumption is saturated at a high consumption rate of 10 mmol/g/h<sup>12</sup>. We  
299 further demonstrated with a computational model that a FtsZ-driven mechanism can  
300 quantitatively explain the timing of division for low levels of nutrient consumption (below ~1  
301 mmol/g/h). This further suggests that the determinant of division in *E. coli* is consumption  
302 rate dependent. Additionally, to the best of our knowledge, only phenomenological models  
303 such as the adder model<sup>5,6</sup> have to date been proposed to quantitatively predict the timing of  
304 division. Here we have formulated the underpinnings of a mechanistic, biochemical model  
305 that provides quantitatively deeper understanding of the first decision to divide in relation to  
306 nutritional input.

307

## 308 [Methods](#)

309 No statistical methods were used to predetermine sample size. The experiments were not  
310 randomized. The investigators were blinded to some sample measurements and outcome  
311 assessment.

### 312 [Strains and plasmids](#)

313 *E. coli* BW 25113 from the Keio collection<sup>41</sup> was used as the wild-type (WT) strain.  
314 Kanamycin markers were excised from the Keio knockout strains *crp*, *pdhR* using pCP20 and  
315 verified using PCR<sup>42</sup>. All strains are listed in [Supplementary Table 4](#) and available from  
316 authors on request.

317 Plasmids are listed in [Supplementary Table 5](#), and all GenBank files are available in  
318 [Supplementary Data 1](#). All plasmids originating from this study were designed using j5  
319 software<sup>43</sup>, assembled using Gibson-based techniques<sup>44</sup>, and sequence verified (Microsynth).  
320 Briefly, the titratable pJKR-L-tetR plasmid<sup>45</sup> was used as a template where the sfGFP  
321 sequence was replaced with *pdhR*, *ftsZ*, *clpX*, *ftsA*, *ftsB*, *ftsL*, and *ftsN*. The plasmid pJKR-L-  
322 tetR was a gift from George Church (Addgene plasmid # 62561). For microfluidic  
323 experiments, the plasmid *epd-icd*<sup>46</sup> was used for constitutive GFP expression. All plasmids  
324 originating from this study are available from AddGene (Article No. 25280).

325

### 326 [Cultivation, pulse feeding, and chemical concentrations](#)

327 Cultivation procedure was followed as in an antecedent study<sup>17</sup>. All cultivation was  
328 performed at 37°C in shaker unless stated otherwise. Briefly, the day before pulsing, cells  
329 from freezer stock were cultivated in LB media for 3-5 h, then diluted 1:20 into 5 mL total of  
330 M9 media (see <sup>17</sup> for recipe), and cultivated for 4-5 h to OD 0.1-0.2. 500 uL of the 5 mL  
331 inoculum was dispensed into 35 mL of M9 media and cultivated overnight at 30 °C. The next

332 day, cultures were typically at OD 0.2-0.3 and were then moved to 37°C and cultivated until  
333 OD 0.8-1.2. At this point, cells were pelleted by centrifugation (3 minutes at 5000 rpm) and  
334 resuspended in 32 mL of diluted M9 media without glucose (1:8 dilution with filtered water).  
335 This point signified the start of starvation. Cultures were then cultivated without glucose for 2  
336 h before the start of pulsing.

337

338 Glucose pulsing was accomplished using two systems (Fig. 1a). With the spin flask system,  
339 an IDEX Corporation Ismatec MCP 404 pump was programmed to dispense 22 µL of 2.5 g/L  
340 glucose solution to a 32 mL culture within a Schott bottle. Starved cultures were transferred to  
341 Schott bottle just before the start of pulsing. Frequency/flow rate was controlled by setting  
342 pause time between dispensations. Cultures were constantly mixed using a stir bar and  
343 maintained at 37 °C by submergence into a water bath. Optical density (OD) was measured in  
344 a Pharmacia Novaspec II spectrophotometer. In the plate reader system, a Tecan Reader  
345 Infinite 200 with injector was programmed to dispense 4 µL of 1.08 g/L glucose solution to a  
346 2.5 mL culture in 6 well plates ((Thermo Fisher Scientific). Plate reader cultivations were  
347 performed at 37 °C and with orbital shaking at maximum amplitude. An empirical function  
348 was used to convert OD measurements from the plate reader system to the spectrometer one.

349

350 Final concentrations of antibiotics were as follows: 100 µg/mL of ampicillin, 34 µg/mL of  
351 chloramphenicol, 50 µg/mL of rifamycin, and 100 ng/mL of azidothymidine. For plasmid  
352 titration experiments, doxycycline was added to the media at the onset of starvation. Each  
353 inducer concentration was cultivated in separate shake flasks during starvation. A titration  
354 curve is shown in [Supplementary Figure 11](#) for the plasmid expressing GFP. 50 ng/mL  
355 working concentration of doxycycline was used for maximal synthesis, 10 ng/mL for half  
356 synthesis, and none for zero synthesis. For the protease inhibitor experiment, a cComplete

357 EDTA-free Protease Inhibitor Cocktail (Roche) tablet was dissolved in 2 mL of diluted media  
358 to form a stock solution. The stock solution was diluted 1:10 in M9 media without carbon  
359 source, inoculated with wild-type *E. coli*, and cultivated for two days at 30 °C to catabolize  
360 latent carbon within the cocktail solution. Cultivation was then pelleted, and the supernatant  
361 was collected and sterile filtered. Filtered, spent protease inhibitor solution was kept at 4 °C  
362 for no more than one day before experiment. Spent protease inhibitor solution was warmed to  
363 room temperature and added 1:10 (total dilution of 1:100 from stock) at the onset of pulse  
364 feeding for the experimental condition. For the negative control condition, spent diluted M9  
365 was added instead.

366

367

### 368 Flow cytometry and DNA distribution analysis

369 Flow cytometry procedure was extended from a previous study<sup>47</sup>. Two to three 5 µL samples  
370 were taken at every time point and diluted 1:10 in stain solution (filtered, spent media with  
371 1:10000 SYBR Green I and 1:5 propidium iodide). Stained samples were incubated for 10 to  
372 15 minutes, diluted 1:100 in filtered, spent media (total dilution of 1:1000), and then  
373 immediately measured in a BD Accuri C6 analyzer (BD Biosciences). 10 uL of diluted  
374 sample were injected at each time point and the first three time points were used to calibrate  
375 the expected number of events ( $E_i$ ). Absolute counts for each sample ( $C_s$ ) were calculated by  
376 accounting for clogging in the sample injection port using the equation  $C_s = E_{\text{cells},s}/E_{\text{total},s} \cdot E_i$   
377 where  $E_{\text{cells},s}$  is the events in the gate (shown in [Supplementary Figure 2](#)) for a given sample,  
378 and  $E_{\text{total},s}$  is the total number of events in a sample. The instrument settings were the  
379 following: Flow rate: slow; Threshold limits: 800 on SSC-H, 300 on FL1-H. All data was  
380 exported to CSV tables, and then gated and analyzed in MATLAB 2015b (Mathworks). FL1-



381 H was used for DNA fluorescence. DNA distribution peaks were separated by fitting a  
382 combination of two normal distributions in MATLAB 2015b.

383

#### 384 Fluorescence microscopy and image analysis

385 5  $\mu$ L samples were taken at every time point and diluted 1:10 in stain solution (filtered, spent  
386 media with 1:10000 SYBR Green I). After 10 minutes, 12  $\mu$ L of stained sample was  
387 deposited onto 2-mm-thick layer of 1% agar on top of a microscope slide. The agar with  
388 samples were dried under air flow, and a cover slip was placed and glued. The cells were then  
389 immediately imaged (phase and fluorescence) using a Nikon Eclipse Ti inverted  
390 epifluorescence microscope equipped with a CoolLED PrecisExcite light source and a Nikon  
391 100 $\times$  oil immersion objective. Filters used for fluorescence imaging of SYBR Green I were  
392 505 nm (excitation) and 545 nm (emission). The exposure time was set to 12 ms. Cell lengths  
393 were calculated using the Straight and Segmented line tools in ImageJ. At least 400 cells were  
394 measured for each time point.

395

#### 396 Microfluidics and analysis

397 The WT strain with *epd-icd*<sup>46</sup> (constitutive GFP expression) was used for all microfluidic  
398 experiments. Non-glucose buffer was diluted M9 media conditioned for 2 hours with starved  
399 cells and then filtered. Glucose media was the non-glucose buffer supplemented with 200  $\mu$ M  
400 glucose. Cells were exposed to non-glucose buffer for at least 2 hours before glucose  
401 exposures to provide initial starvation. Microfluidic channels were 100 microns wide (where  
402 the cells were imaged) and 60 microns deep, with two inlet ports, a 5-pointed junction, and  
403 two outlet ports. A pressure control system (Fluigent) allowed control of the duration and  
404 frequency of the glucose pulses. Before injecting the cells, the microfluidic devices were  
405 incubated with poly-L-lysine (Sigma, P8920; concentration 0.01% w/v) for 15 minutes to

406 enhance the attachment of bacteria to the bottom glass surface of the channels<sup>48</sup>. All  
407 experiments were performed using a Nikon Ti-E inverted epifluorescence microscope  
408 equipped with Andor Zyla sCMOS camera, LED light sources (wavelengths 395, 440, 470,  
409 508, 555, and 640 nm), a CAGE (LIS) incubator to maintain temperature at 37 °C, and a  
410 Perfect Focus System to reduce focal drift during long acquisition times. Image analysis was  
411 performed in MATLAB (Mathworks) using in-house cell tracking and identification  
412 algorithms. For calculations of GFP synthesis rate and cell extension rate, linear fitting was  
413 used on the data points for each cell before division.

414

#### 415 [Real-time metabolomics profiling, annotation of ions, and data normalization](#)

416 Whole cell broth, real-time metabolic profiling procedures were followed as in<sup>17</sup>. The ion  
417 annotation method is described in<sup>49</sup>. Ion suppression effects stemming from antibiotic  
418 addition are adjusted for as described in<sup>17</sup>. All ion intensity data were Z-normalized and  
419 aligned (set  $Z$ ) using the formula:

$$Z = \frac{S - \overline{S_{ref}}}{\sigma_{ref}}$$

420  $S$  is the raw ion counts,  $\overline{S_{ref}}$  is the average of the reference set, and  $\sigma_{ref}$  is the standard  
421 deviation of the reference set. For comparison to the non-pulsing condition ( $f = 0$  mmol/g/h),  
422 the first five minutes were used for the reference set. For the antibiotic perturbations, the first  
423 ten minutes were used for the reference set. All annotated ion data before Z-normalization are  
424 available in [Supplementary Data 2](#).

425

#### 426 [Generation of washed lysates](#)

427

428 Using the spin flask system, natively labeled cells were fed at TI feedrates of 0, 0.06, 0.12, or  
429 0.18 mmol/g/h for 6 hours with uniformly-labeled <sup>13</sup>C glucose. After the 6 hours, 25 mL of

430 the culture were sampled, pelleted, and supernatants were discarded. Pellets were stored at -80  
431 °C until extraction. Cells were lysed via resuspension into 2.5 mL of B-PER solution (Thermo  
432 Fisher Scientific) and room temperature incubation for 10 minutes. 750  $\mu$ L of lysates were  
433 clarified and spun through 10 kDa size exclusion columns (Merck Millipore Ltd.). The flow  
434 through was discarded, and the retentate was resuspended in 200  $\mu$ L of filtered ddH<sub>2</sub>O. In  
435 total, three such spin-wash steps were performed and the final, washed retentate was used for  
436 further measurement.

437

#### 438 Protein hydrolysis and measurement

439 For protein hydrolysis and measurement, a previous protocol<sup>50</sup> was extended. The washed  
440 lysate was adjusted to 6 N by HCl addition. Acidified lysates were incubated for 1 hour at  
441 110° C and then dried under airflow at 65 °C. Dried samples were silylated by dissolution in  
442 50  $\mu$ L dimethylformamide and then added to 100  $\mu$ L L N-tert-butyltrimethylsilyl-N-  
443 methyltrifluoroacetamide with 1% tertbutyldimethylchlorosilane. Reactions were then  
444 incubated at 85 °C for 1 hour. Products were measured on a 6890 GC combined with a 5973  
445 Inert SL MS system (Agilent Technologies). Labeled fractions were adjusted for native  
446 isotope abundance<sup>50</sup>.

447

#### 448 DNA hydrolysis and measurement

449 For measurement of deoxyribose derived from purified DNA, the PureLink Genomic DNA  
450 Mini (Thermo Fisher Scientific) kit was used to isolate DNA from the cleaned lysate. 0.5 to  
451 1.0  $\mu$ g of DNA was then hydrolyzed to nucleosides using the EpiQuik One-Step DNA  
452 Hydrolysis Kit (Epigentek Group Inc). Reaction products were diluted to 100  $\mu$ L with filtered  
453 water and spun through a size exclusion column. The flow through was directly measured on  
454 a 5500 QTRAP triple-quadrupole mass spectrometer in positive mode with MRM scan type

455 (AB Sciex). Nucleoside standards were used for compound optimization. The deoxyribose-  
456 containing fragment of deoxyadenosine was measured for labeling fraction using SIM ( $m/z$   
457  $252.3 > 117.2$  through  $257.3 > 122.2$ ).

458

#### 459 Glycogen hydrolysis and measurement

460 For measuring glucose originating from glycogen, a previous method<sup>51</sup> was extended.  
461 Washed lysate was acidified to 1 N by HCl addition in 300  $\mu$ L total volume and incubated at  
462 110° C for 1 h to hydrolyze polysaccharides. Samples were cooled on ice and neutralized with  
463 84  $\mu$ L of 3 N NaOH and then separated in size exclusion filters (10 kDa). The flow through  
464 was collected and dried in a SpeedVac setup (Christ) and precipitated with 500  $\mu$ L cold  
465 ethanol. The ethanol resuspension was pelleted, and then the supernatant was separated and  
466 dried overnight in the SpeedVac. Samples were dissolved in 50  $\mu$ L of pyridine with 2%  
467 hydroxylamine hydrochloride and incubated for 1 h at 90 °C. Samples were cooled to room  
468 temperature, and 100  $\mu$ L of propionic anhydride was added. Mixed samples were incubated  
469 for 30 minutes at 60 °C and then measured on the aforementioned GC-MS system.

470

#### 471 Immunoblotting

472 For sampling, 500  $\mu$ L of culture was collected, pelleted, and the supernatant was decanted.  
473 Samples were then immediately frozen at -20 °C for no more than one week before blotting.  
474 On day of blotting, samples were resuspended in 50  $\mu$ L B-PER solution (Thermo Fisher  
475 Scientific) and incubated with shaking at room temperature for 10 min. Samples were pelleted  
476 and protein concentration was determined by Bradford assay (Biorad) according to supplied  
477 protocol. 1.5  $\mu$ g total protein was loaded into each well of a 4-12% polyacrylamide gel  
478 (Sigma), electrophoretically separated, and transferred to a nitrocellulose membrane (GE  
479 Healthcare). Membranes were blocked using TBS-T buffer with 5% nonfat dry milk (Coop)

480 for 1 h. Then membranes were consequently incubated with prokaryotic Anti-FtsZ primary  
481 antibody (Agrisera, Product No. AS10715) at 1:2000 dilution in TBS-T with milk overnight  
482 (4 °C with agitation). The membrane was then washed three times with TBS-T and incubated  
483 with HRP-conjugated anti-rabbit secondary antibody (Millipore, Product No. AP307P) at  
484 1:10000 dilution in TBS-T with milk. Secondary incubation was conducted for 1 h, and then  
485 the membrane was washed with TBS-T three times. The membrane was then incubated in  
486 Amersham ELC Prime Western Blotting Detection Reagent (GE Healthcare) to product  
487 specifications. After 5 min, the membrane was imaged first under bright-field to visualize  
488 ladder lanes and then with chemiluminescence measurement for protein bands. All imaging  
489 was done with a gel imaging station (Bucher Biotec). Ladder lanes were appended to the  
490 image with protein bands using GIMP software with exact pixel alignment. Band  
491 quantification was performed with MATLAB R2015B (Mathworks).

492

### 493 Calculations and fitting

494 MATLAB R2015B (Mathworks) or Python 2.7 were used for all calculations, fitting (using  
495 the *fitnlm* function in MATLAB), and data analysis. Optical density was converted to gram  
496 dry cell weight (DCW) with the conversion 1 OD = 0.4 g DCW/L, as determined for the  
497 strain and spectrophotometer specifically<sup>52</sup>. For lag time ( $t_{lag}$ ), growth rate ( $\mu$ ), and initial cell  
498 amount ( $OD_i$ ) calculations, a threshold linear fit was applied to each OD versus time ( $t$ ) plot:

$$OD(t) = \begin{cases} OD_i & \text{for } t < t_{lag} \\ \mu(t - t_{lag}) + OD_i & \text{for } t \geq t_{lag} \end{cases}$$

499 OD values 3 standard deviations above the mean of each dataset were excluded from fits.

500 To empirically separate the non-dividing and dividing phases (Fig. 2a), a threshold

501 exponential decay fit was used:

$$t_{\text{lag}}(f) = \begin{cases} \text{indeterminate for } f < p_0 \\ p_1 \exp(-p_2(f - p_0)) \text{ for } f \geq p_0 \end{cases}$$

502 Correlation of coefficient ( $R^2$ ) for the FtsZ model was calculated after  $\log_{10}$  transformation of  
503 the lag times. Data that had 0 minute lag time were excluded from the analysis.

504

### 505 Code availability

506 All code used for calculations and figure generation is available without restriction in  
507 [Supplementary Data 2](#) or at <https://github.com/karsekar/pulsefeeding-analysis>.

508

### 509 Data availability

510 All data used in figures except from flow cytometry are available in the [Supplementary Data](#)  
511 [2](#) or at <https://github.com/karsekar/pulsefeeding-analysis>. Flow cytometry data is available at  
512 <https://doi.org/10.5281/zenodo.1035825>. Any other data is available from the authors on  
513 reasonable request.

514

## 515 References

- 516 1. Ward, J. E. & Lutkenhaus, J. Overproduction of FtsZ induces minicell formation in E. coli. *Cell*  
517 **42**, 941–949 (1985).
- 518 2. Cooper, S. & Helmstetter, C. E. Chromosome replication and the division cycle of Escherichia  
519 coli B/r. *J. Mol. Biol.* **31**, 519–540 (1968).
- 520 3. Weart, R. B. *et al.* A metabolic sensor governing cell size in bacteria. *Cell* **130**, 335–347 (2007).
- 521 4. Willis, L. & Huang, K. C. Sizing up the bacterial cell cycle. *Nat. Rev. Microbiol.* **15**, 606–620  
522 (2017).

- 523 5. Campos, M. *et al.* A constant size extension drives bacterial cell size homeostasis. *Cell* **159**,  
524 1433–1446 (2014).
- 525 6. Taheri-Araghi, S. *et al.* Cell-Size Control and Homeostasis in Bacteria. *Curr. Biol.* **25**, 385–391  
526 (2015).
- 527 7. Wang, J. D. & Levin, P. A. Metabolism, cell growth and the bacterial cell cycle. *Nat. Rev.*  
528 *Microbiol.* **7**, 822–827 (2009).
- 529 8. Koch, A. L. The adaptive responses of Escherichia coli to a feast and famine existence. *Adv.*  
530 *Microb. Physiol.* **6**, 147–217 (1971).
- 531 9. Stocker, R. Marine microbes see a sea of gradients. *Science* **338**, 628–633 (2012).
- 532 10. Löffler, M. *et al.* Engineering E. coli for large-scale production - Strategies considering ATP  
533 expenses and transcriptional responses. *Metab. Eng.* **38**, 73–85 (2016).
- 534 11. Liu, K., Bittner, A. N. & Wang, J. D. Diversity in (p)ppGpp metabolism and effectors. *Curr.*  
535 *Opin. Microbiol.* **24**, 72–79 (2015).
- 536 12. Monk, J. M. *et al.* Multi-omics Quantification of Species Variation of Escherichia coli Links  
537 Molecular Features with Strain Phenotypes. *Cell Syst.* **3**, 238–251.e12 (2016).
- 538 13. Akerlund, T., Nordström, K. & Bernander, R. Analysis of cell size and DNA content in  
539 exponentially growing and stationary-phase batch cultures of Escherichia coli. *J. Bacteriol.* **177**,  
540 6791–6797 (1995).
- 541 14. Van Bodegom, P. Microbial maintenance: A critical review on its quantification. *Microb. Ecol.*  
542 **53**, 513–523 (2007).
- 543 15. Shuler, M. L. & Kargi, F. *Bioprocess Engineering: Basic Concepts*. (Prentice Hall, 2001).
- 544 16. Basan, M. *et al.* Overflow metabolism in Escherichia coli results from efficient proteome  
545 allocation. *Nature* **528**, 99–104 (2015).
- 546 17. Link, H., Fuhrer, T., Gerosa, L., Zamboni, N. & Sauer, U. Real-time metabolome profiling of the  
547 metabolic switch between starvation and growth. **12**, (2015).
- 548 18. Caspi, R. *et al.* The MetaCyc database of metabolic pathways and enzymes and the BioCyc  
549 collection of pathway/genome databases. *Nucleic Acids Res.* **44**, D471–D480 (2016).

- 550 19. Madar, D. *et al.* Promoter activity dynamics in the lag phase of Escherichia coli. *BMC Syst. Biol.*  
551 7, 136 (2013).
- 552 20. Cooper, D. L. & Lovett, S. T. Toxicity and tolerance mechanisms for azidothymidine, a  
553 replication gap-promoting agent, in Escherichia coli. *DNA Repair* 10, 260–270 (2011).
- 554 21. Wilson, W. A. *et al.* Regulation of glycogen metabolism in yeast and bacteria. *FEMS Microbiol.*  
555 *Rev.* 34, 952–985 (2010).
- 556 22. Milo, R., Jorgensen, P., Moran, U., Weber, G. & Springer, M. BioNumbers—the database of key  
557 numbers in molecular and cell biology. *Nucleic Acids Res.* 38, D750–D753 (2010).
- 558 23. Sekar, K., Gentile, A. M., Bostick, J. W. & Tyo, K. E. J. N-Terminal-Based Targeted, Inducible  
559 Protein Degradation in Escherichia coli. *PLoS One* 11, e0149746 (2016).
- 560 24. Flynn, J. M., Neher, S. B., Kim, Y. I., Sauer, R. T. & Baker, T. A. Proteomic discovery of cellular  
561 substrates of the ClpXP protease reveals five classes of ClpX-recognition signals. *Mol. Cell* 11,  
562 671–683 (2003).
- 563 25. Humbard, M. A., Surkov, S., De Donatis, G. M., Jenkins, L. M. & Maurizi, M. R. The N-  
564 degradome of Escherichia coli: limited proteolysis in vivo generates a large pool of proteins  
565 bearing N-degrons. *J. Biol. Chem.* 288, 28913–28924 (2013).
- 566 26. Zhou, J. & Rudd, K. E. EcoGene 3.0. *Nucleic Acids Res.* 41, D613–D624 (2013).
- 567 27. Schmidt, A. *et al.* The quantitative and condition-dependent Escherichia coli proteome. *Nat.*  
568 *Biotechnol.* 34, 104–110 (2016).
- 569 28. Adams, D. W. & Errington, J. Bacterial cell division: assembly, maintenance and disassembly of  
570 the Z ring. *Nat. Rev. Microbiol.* 7, 642–653 (2009).
- 571 29. Göhler, A.-K. *et al.* More than just a metabolic regulator—elucidation and validation of new  
572 targets of PdhR in Escherichia coli. *BMC Syst. Biol.* 5, 197 (2011).
- 573 30. Quail, M. A., Haydon, D. J. & Guest, J. R. The pdhR-aceEF-lpd operon of Escherichia coli  
574 expresses the pyruvate dehydrogenase complex. *Mol. Microbiol.* 12, 95–104 (1994).
- 575 31. You, C. *et al.* Coordination of bacterial proteome with metabolism by cyclic AMP signalling.  
576 *Nature* 500, 301–306 (2013).



- 577 32. Camberg, J. L., Hoskins, J. R. & Wickner, S. ClpXP protease degrades the cytoskeletal protein,  
578 FtsZ, and modulates FtsZ polymer dynamics. *Proc. Natl. Acad. Sci. U. S. A.* **106**, 10614–10619  
579 (2009).
- 580 33. Farrell, C. M., Grossman, A. D. & Sauer, R. T. Cytoplasmic degradation of ssrA-tagged proteins.  
581 *Mol. Microbiol.* **57**, 1750–1761 (2005).
- 582 34. Addinall, S. G., Cao, C. & Lutkenhaus, J. FtsN, a late recruit to the septum in Escherichia coli.  
583 *Mol. Microbiol.* **25**, 303–309 (1997).
- 584 35. Weiss, D. S. Bacterial cell division and the septal ring. *Mol. Microbiol.* **54**, 588–597 (2004).
- 585 36. Jonas, K. To divide or not to divide: control of the bacterial cell cycle by environmental cues.  
586 *Curr. Opin. Microbiol.* **18**, 54–60 (2014).
- 587 37. Erickson, D. W. *et al.* A global resource allocation strategy governs growth transition kinetics of  
588 Escherichia coli. *Nature* **551**, 119–123 (2017).
- 589 38. Towbin, B. D. *et al.* Optimality and sub-optimality in a bacterial growth law. *Nat. Commun.* **8**,  
590 14123 (2017).
- 591 39. Weart, R. B. & Levin, P. A. Growth rate-dependent regulation of medial FtsZ ring formation. *J.*  
592 *Bacteriol.* **185**, 2826–2834 (2003).
- 593 40. Rueda, S., Vicente, M. & Mingorance, J. Concentration and assembly of the division ring proteins  
594 FtsZ, FtsA, and ZipA during the Escherichia coli cell cycle. *J. Bacteriol.* **185**, 3344–3351 (2003).
- 595 41. Baba, T. *et al.* Construction of Escherichia coli K-12 in-frame, single-gene knockout mutants: the  
596 Keio collection. *Mol. Syst. Biol.* **2**, 2006.0008 (2006).
- 597 42. Datsenko, K. A. & Wanner, B. L. One-step inactivation of chromosomal genes in Escherichia coli  
598 K-12 using PCR products. *Proc. Natl. Acad. Sci. U. S. A.* **97**, 6640–6645 (2000).
- 599 43. Hillson, N. J., Rosengarten, R. D. & Keasling, J. D. j5 DNA assembly design automation  
600 software. *ACS Synth. Biol.* **1**, 14–21 (2012).
- 601 44. Gibson, D. G. *et al.* Enzymatic assembly of DNA molecules up to several hundred kilobases. *Nat.*  
602 *Methods* **6**, 343–345 (2009).
- 603 45. Rogers, J. K. *et al.* Synthetic biosensors for precise gene control and real-time monitoring of  
604 metabolites. *Nucleic Acids Res.* **43**, 7648–7660 (2015).

- 605 46. Gerosa, L., Kochanowski, K., Heinemann, M. & Sauer, U. Dissecting specific and global  
606 transcriptional regulation of bacterial gene expression. *Mol. Syst. Biol.* **9**, 658 (2013).
- 607 47. Berney, M., Hammes, F., Bosshard, F., Weilenmann, H.-U. & Egli, T. Assessment and  
608 interpretation of bacterial viability by using the LIVE/DEAD BacLight Kit in combination with  
609 flow cytometry. *Appl. Environ. Microbiol.* **73**, 3283–3290 (2007).
- 610 48. Rozhok, S. *et al.* Attachment of motile bacterial cells to prealigned holed microarrays. *Langmuir*  
611 *ACS J. Surf. Colloids* **22**, 11251–11254 (2006).
- 612 49. Fuhrer, T., Heer, D., Begemann, B. & Zamboni, N. High-throughput, accurate mass metabolome  
613 profiling of cellular extracts by flow injection-time-of-flight mass spectrometry. *Anal. Chem.* **83**,  
614 7074–7080 (2011).
- 615 50. Nanchen, A., Fuhrer, T. & Sauer, U. Determination of metabolic flux ratios from <sup>13</sup>C-  
616 experiments and gas chromatography-mass spectrometry data: protocol and principles. *Methods*  
617 *Mol. Biol. Clifton NJ* **358**, 177–197 (2007).
- 618 51. Long, C. P., Au, J., Gonzalez, J. E. & Antoniewicz, M. R. (<sup>13</sup>C) metabolic flux analysis of  
619 microbial and mammalian systems is enhanced with GC-MS measurements of glycogen and RNA  
620 labeling. *Metab. Eng.* **38**, 65–72 (2016).
- 621 52. Gerosa, L. *et al.* Pseudo-transition Analysis Identifies the Key Regulators of Dynamic Metabolic  
622 Adaptations from Steady-State Data. *Cell Syst.* **1**, 270–282 (2015).

623

624 **Supplementary information** is available in the online version of the paper.

## 625 [Acknowledgements](#)

626 We thank the Sauer laboratory members, B. Towbin, W. Bothfeld, H. de Jong, M. Christen,  
627 R. Naisbit, E. Secchi, and E. Slack for helpful conversations, technical assistance, and  
628 manuscript feedback. We thank the ETH Flow Cytometry Core Facility for access, advice,  
629 and training for flow analyzer measurements.

630

## 631 [Author contributions](#)

632 U.S. and T.F. conceived the study. K.S. and U.S. designed the experiments. U.S., R.S., and  
633 M.B. supervised the work. K.S. developed and performed the spin flask, plate reader, flow  
634 cytometry, microscopy, real-time metabolomics, immunoblotting, and molecular cloning  
635 procedures. K.S., T.F., and M.F.B. developed and performed the labeling experiments. J.N.  
636 and V.I.F. developed the microfluidic platform. R.R. performed the microfluidic experiments.  
637 K.S., R.R., E.N., and T.F. performed the calculations and analyzed the data. K.S. and E.N.  
638 developed the FtsZ model. K.S., U.S., E.N., and R.R. wrote the manuscript. All authors  
639 reviewed and approved the manuscript.

640

## 641 [Author information](#)

642 Reprints and permissions information is available at [www.nature.com/reprints](http://www.nature.com/reprints). The authors  
643 declare no competing financial interests. Readers are welcome to comment on the online  
644 version of the paper. Correspondence and request for materials should be addressed to U.S.  
645 ([sauer@imsb.biol.ethz.ch](mailto:sauer@imsb.biol.ethz.ch)).

646

647 **Figures**

648 **Figure 1: Schematics for nutrient pulse systems.**

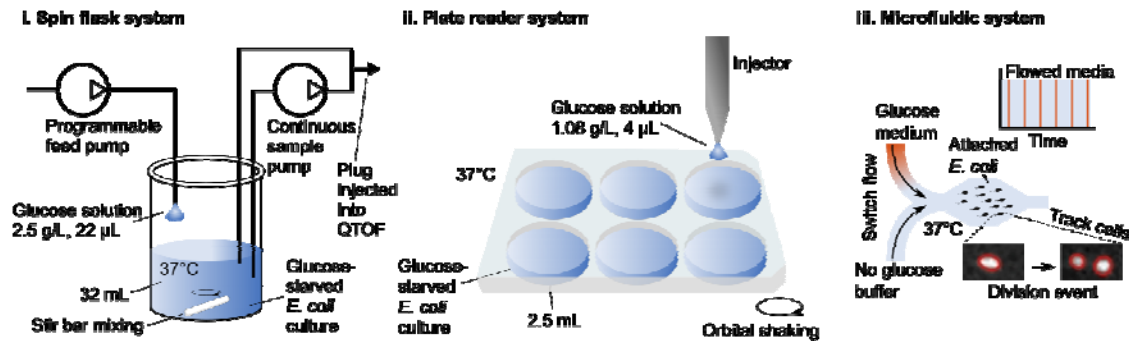

649

650 Three separate systems were used to pulse glucose to starved *E. coli*. The spin flask system (i)  
651 and plate reader system (ii) provided glucose pulses at defined frequencies. In the real-time  
652 metabolomics<sup>17</sup> configuration, another pump circulated culture and injected 2 μL of culture  
653 directly into a time of flight (QTOF) mass spectrometer every 10–15 s from the spin flask  
654 system. A microfluidic platform (iii) reproduced the pulse feeding and tracked division  
655 events. A pulsing period is defined as the time between the start of successive glucose  
656 medium exposures. During each pulse, glucose medium was flowed for 10 seconds, and the  
657 no glucose buffer was flowed in the intervening period.

658

659 **Figure 2: Lag time to division depends on the frequency of pulsed glucose for a**  
 660 **subpopulation.**

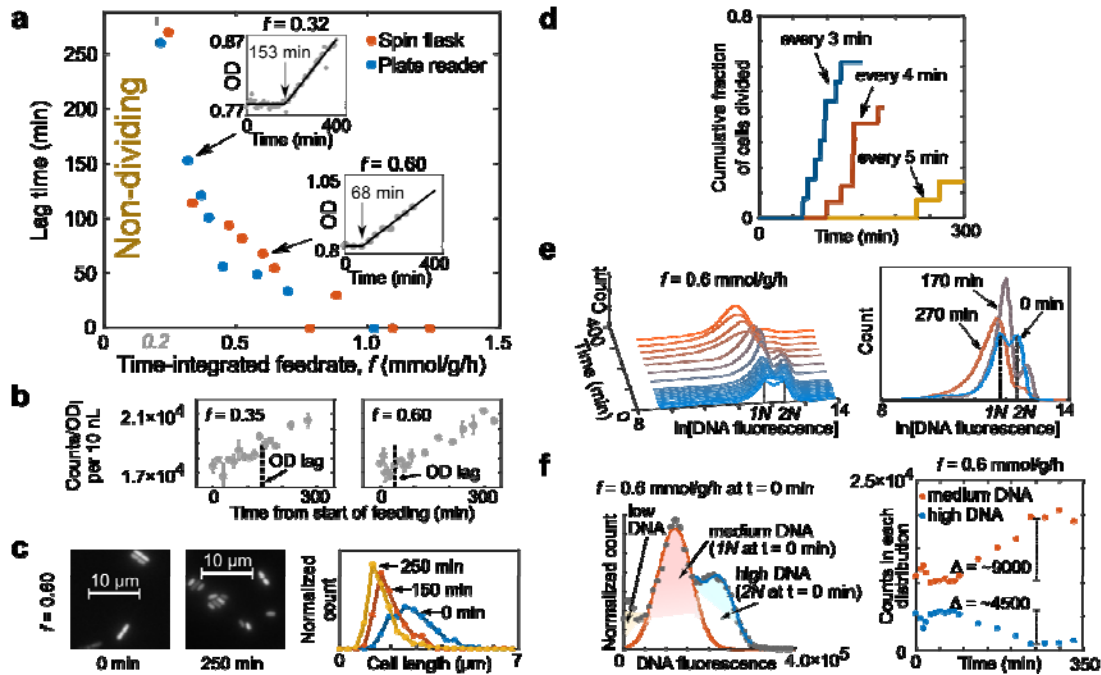

661

662 **a**, After 2 hour starvation, *E. coli* cultures were pulse fed 10  $\mu\text{M}$  glucose at varying  
 663 frequencies using the spin flask and plate reader systems, and optical density (OD) was  
 664 measured over time (inset example figures). Grey dots are OD measurements and the black  
 665 lines are an empirical fit (see [Methods](#)). For separate experiments ( $n = 18$ ), the lag time is  
 666 plotted against the frequency, represented as the time-integrated (TI) feedrate  $f$  (mmol  
 667 glucose/g dry cell weight/hour). An empirical fit (grey solid line, see [Methods](#)) was used to  
 668 separate the lag (non-dividing) and dividing phases. All OD data is summarized in  
 669 [Supplementary Table 2](#). **b**, Normalized absolute cell counts versus time show linear increases  
 670 after lag time for exemplary feedrates. Data are mean  $\pm$  standard error of technical replicates  
 671 ( $n = 2-3$ ). Lag predicted from the empirical fit is indicated by vertical dotted lines. **c**, The  
 672 average size of cells decreased after lag. Micrographs and cell length distributions ( $n > 400$   
 673 per distribution) are shown for specific time points, with  $f = 0.6$  mmol/g/h. **d**, Immobilized  
 674 cells in the microfluidic experiment divided after a lag time that decreased with increasing  
 675 glucose pulse frequency. The labeled times indicate the period, time between pulses, for a  
 676 given experiment. **e**, Time course of the distribution of cellular DNA content. Sampled cells  
 677 were stained with SYBR Green I and measured with flow cytometry over the course of a  
 678 pulsing experiment ( $f = 0.6$  mmol/g/h). Gating is shown in [Supplementary Figure 2](#). The DNA  
 679 content distribution over time is shown on the left side, and three specific time points are  
 680 shown on the right. Within the first time point ( $t = 0$ ), the highest distribution is taken to be  
 681 high DNA content (2N), and the distribution at half of the 2N average was taken (1N) as  
 682 medium DNA. **f**, DNA distributions were separated into medium (1N) and high DNA (2N).  
 683 Distribution-specific estimated counts (see [Methods](#)) over time ( $f = 0.6$  mmol/g/h) suggested  
 684 that net division from high to medium DNA cells can explain the increase in cell counts and  
 685 OD increase.

686

687 **Figure 3: Maintenance metabolism alone cannot explain non-division.**

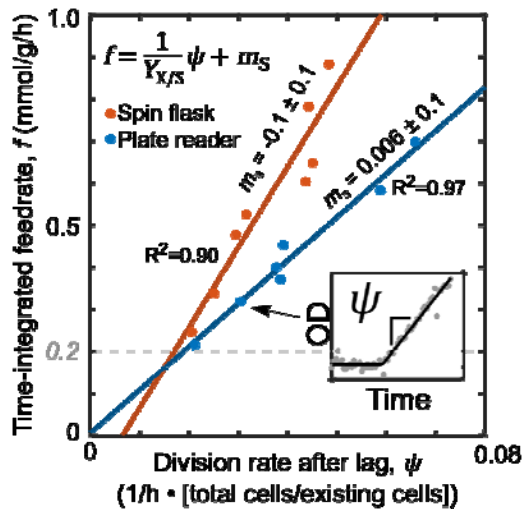

688

689 Linear decomposition of the TI feedrate ( $f$ ) from data in Fig 2a separated the division ( $\Psi/Y_{x/s}$ )  
 690 and maintenance terms ( $m_s$ ):

$$f = \frac{1}{Y_{X/S}} \psi + m_s$$

691 For the division term, the division rate ( $\Psi$ , units of  $1/h \cdot [\text{number of new and existing}$   
 692  $\text{cells}]/[\text{number of existing cells}]$ ) was calculated to be the slope after the lag ends (inset). For  
 693 each pulsing system, the calculated yield ( $Y_{x/s}$ , units of  $\text{g DCW}/\text{mmol glucose} \cdot [\text{number of}$   
 694  $\text{new and existing cells}]/[\text{number of existing cells}]$ ) was constant and the extrapolated  
 695 maintenance term ( $m_s$ ) was not significantly detected ( $m_s = -0.1 \pm 0.1 \text{ mmol/g/h}$  for spin flask  
 696 system and  $m_s = 0.006 \pm 0.1 \text{ mmol/g/h}$  for the plate reader setup).  
 697

698 **Figure 4: Non-dividing *E. coli* use pulse-fed carbon to make nucleic acids and protein.**

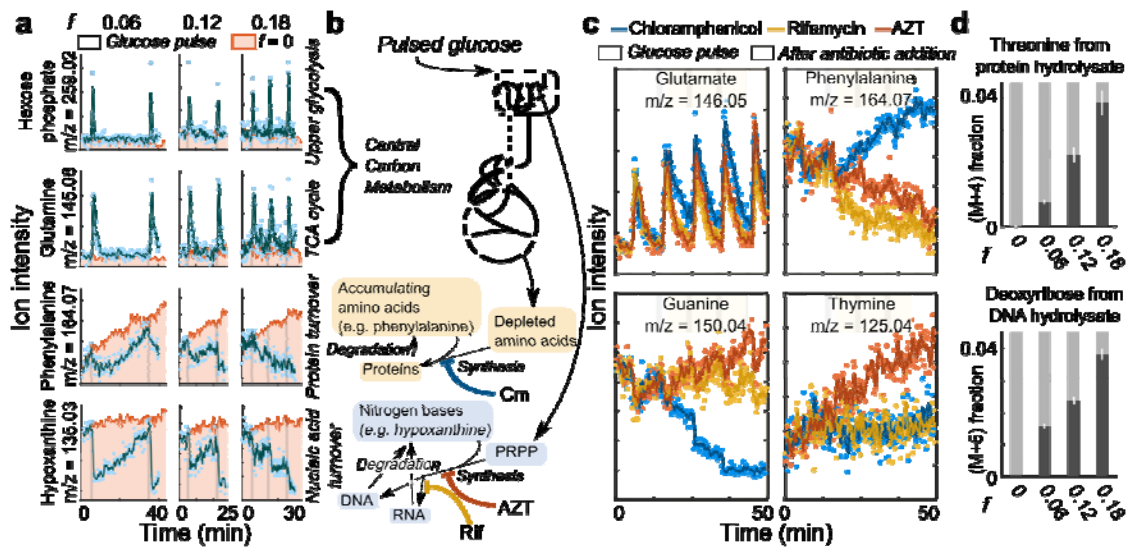

699

700 **a**, The spin flask system for glucose pulsing was connected to a real-time metabolomics  
 701 platform. Traces of exemplary ions are shown that correspond to hexose phosphate,  
 702 phenylalanine, and hypoxanthine for pulsing at non-division supporting frequencies of 0.06,  
 703 0.12, and 0.18 mmol/g/h. The TI feedrate is abbreviated as  $f$  (units: mmol glucose/g dry cell  
 704 weight/hour). Glucose pulses are indicated by the grey bars, and the pink region shows a no  
 705 pulse control. Dots are ion intensity measurements. Solid lines are a moving average filter of  
 706 the measured ion intensity. For clarity, dots are not shown for  $f = 0$  mmol/g/h condition. **b**, A  
 707 metabolic scheme describing the propagation of fed glucose. Pulsed glucose is hypothesized  
 708 to pass through central carbon metabolism and then be converted to downstream pathways  
 709 including amino acid synthesis and nucleic acid synthesis. For nucleic acid synthesis, glucose  
 710 is converted to the intermediate PRPP, which then can combine with nitrogen bases to form  
 711 nucleotides for nucleic acid synthesis. Different pathways can be blocked with antibiotics.  
 712 Color scheme used here accords to Fig. 4c. **c**, Influence of antibiotics that inhibit  
 713 macromolecular synthesis at the non-division TI feedrate of 0.18 mmol/g/h. Antibiotics were  
 714 added one minute after the second pulse (yellow region). Four different ions are shown  
 715 corresponding to glutamate, phenylalanine, guanine, and thymine. Chloramphenicol (blue)  
 716 inhibits protein biosynthesis, rifamycin (orange) inhibits RNA polymerase, and  
 717 azidothymidine (AZT; red) inhibits DNA synthesis. Ion traces with negative control ( $f = 0.18$   
 718 mmol/g/h, no antibiotics) are shown in Supplementary Figure 5. **d**, Percentage of labeled  
 719 threonine and deoxyribose from protein and DNA hydrolysate shows *de novo* protein and  
 720 DNA synthesis in non-dividing cells. After 6 hours of pulsing uniformly labeled  $^{13}\text{C}$ -glucose,  
 721 cultures were lysed, and their macromolecules were washed free of latent metabolites and  
 722 hydrolyzed to monomers. Labeling data are presented as the mean  $\pm$  standard error of  
 723 independent biological replicates ( $n = 3$ , all pairwise  $P < 0.02$  as determined by one sided  
 724 Student's t-test). All ion data is available in Supplementary Table 1, and labeling data of all  
 725 measured amino acids is available in Supplementary Table 3.

726

727 **Figure 5: The limiting, degrading entity hypothesis.**

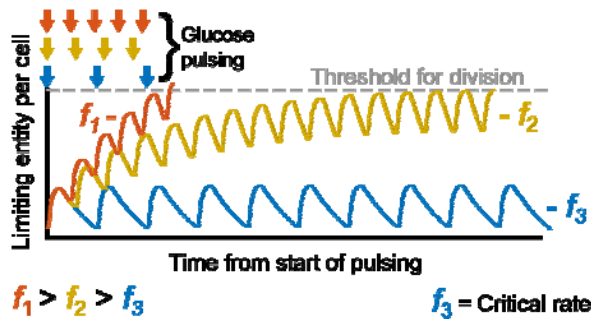

729 The dependence of lag time on glucose pulse frequency can be explained with constitutive  
730 degradation of the limiting entity. In the model shown, the entity abundance is synthesized  
731 with each glucose pulse and depletes constitutively. Three example frequencies ( $f_1 > f_2 > f_3$ )  
732 are shown where slight changes in period time dramatically changes the time for the entity to  
733 reach the threshold needed to engender division. When synthesis and degradation of the entity  
734 are equal, the TI feedrate is at the critical rate ( $f_3$ ). Arrows indicate the glucose pulse  
735 frequency.



736 **Figure 6: Dynamics of FtsZ abundance determines the division timing.**

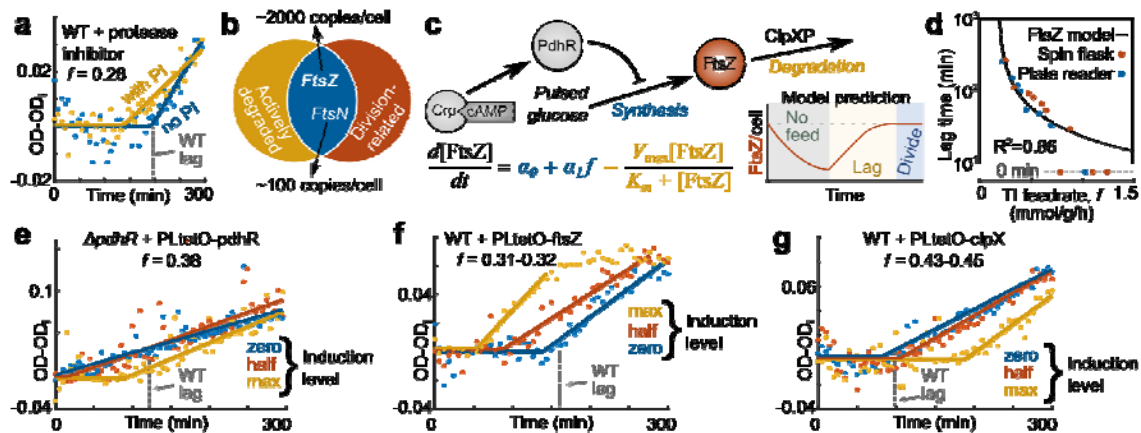

737

738 **a**, Pulsing experiment was repeated in the presence of protease inhibitor (PI) that reduced the  
 739 lag time for a given TI feedrate ( $f = 0.28$  mmol/g/h). The TI feedrate is abbreviated as  $f$  (units:  
 740 mmol glucose/g dry cell weight/hour). Wild-type lag (from Fig. 2a empirical fit) is indicated  
 741 by the dotted grey line. **b**, The sets of proteins that are actively degraded and division-related  
 742 intersect at FtsZ and FtsN. **c**, A schematic of how FtsZ abundance changes. FtsZ is repressed  
 743 by the transcriptional factor, PdhR. PdhR is activated by Crp-cAMP. FtsZ is also degraded  
 744 primarily by the ClpXP protease complex. An approximate FtsZ threshold model poses a  
 745 basal synthesis rate ( $\alpha_0$ ), a feedrate-dependent synthesis ( $\alpha_1 f$ ), and a degradation term (the  
 746 Michaelis Menten term) to explain changes in FtsZ abundance with and without pulsing. Per  
 747 the model, FtsZ would deplete via degradation during starvation, be synthesized with glucose  
 748 pulsing, and engender division when its abundance reaches the threshold concentration. **d**,  
 749 Analytical solution of the model (Supplementary Information) plotted against data from Fig.  
 750 2a ( $R^2 = 0.86$ ). Lag time axis is log scaled. **e**, Genetically induced titration of PdhR in a *pdhR*  
 751 mutant reintroduced lag commensurate with expression level for a given TI feedrate ( $f = 0.38$   
 752 mmol/g/h). Induction level corresponds to the amount of doxycycline (max – 50 ng/uL, half –  
 753 10 ng/uL, and zero 0 ng/uL) added at the onset of starvation. **f**, Lag time reduced with  
 754 synthesis levels of titrated FtsZ in the wild-type strain at  $f = 0.31$ – $0.32$  mmol/g/h. **g**, Lag time  
 755 increased with titrated synthesis of ClpX in wild-type cells at  $f = 0.43$ – $0.45$  mmol/g/h.

756

757 **Supplementary Figures**

758 **Supplementary Figure 1: Total glucose fed during lag does not explain division**  
759 **occurrence.**

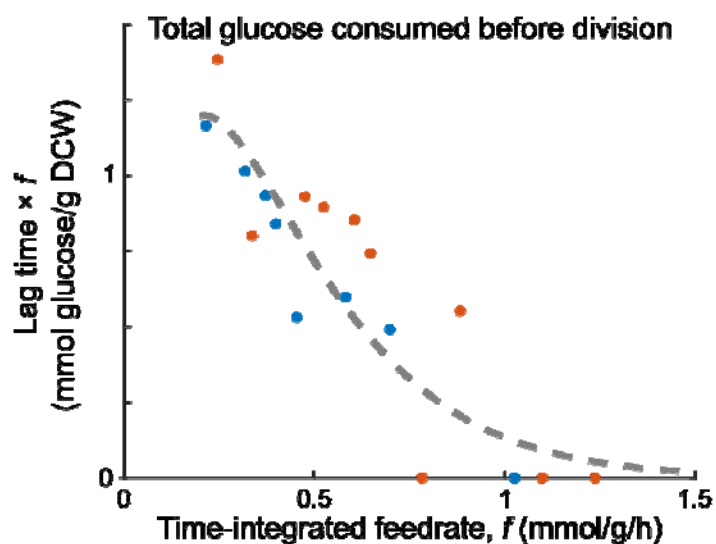

760

761 Data from Fig. 2a was replotted to total amount of glucose fed before division (lag duration  
762 times the TI feedrate) versus the TI feedrate. The total amount of glucose needed to trigger  
763 division is not constant and increases for decreasing TI feedrate.

764

765 **Supplementary Figure 2: Gating for flow cytometry experiments.**

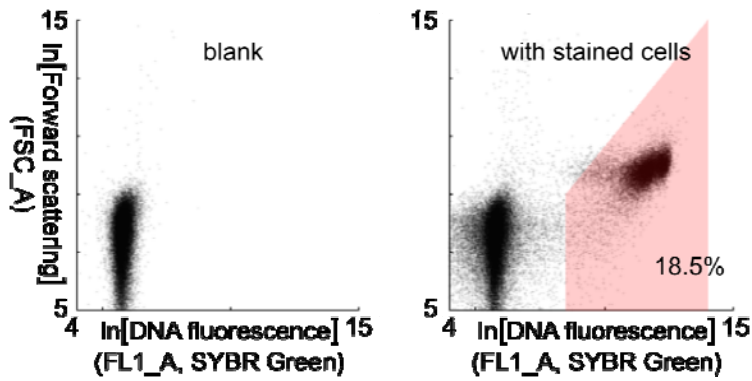

767 For all flow cytometry experiments, cells were stained with SYBR Green I dye and incubated  
768 for at least 10 minutes before measurement (see [Methods](#)). 10  $\mu$ L of events were measured  
769 (scattering and fluorescence) at the slow rate (14  $\mu$ L/min) and then analyzed with MATLAB  
770 R2015B. A scatter plot of the measured events are shown for a blank (left) and cell sample  
771 (right). We only focused on the forward scattering and green fluorescence dimensions. The  
772 gating used for all samples is shown by the red region. In the sample shown, the gate captured  
773 18.5% of the events, which were taken to be the bacterial cells.

774

775

776 **Supplementary Figure 3: Optical density flattens beyond 6 h.**

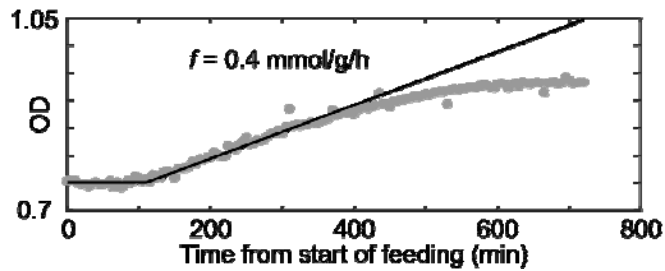

777

778 For the given glucose pulsing experiment ( $f = 0.4 \text{ mmol/g/h}$ ), optical density (OD) was  
779 measured beyond the normal 6 h. Measurements are indicated by grey dots. Beyond the  
780 default experiment time of 6 h, the OD begins to flatten and ceases linear increasing. The  
781 black line indicates the predicted OD when no flattening is assumed. The prediction was  
782 based off the empirical model of Fig 2a (as described in Methods) and the calculated division  
783 yield from Fig 3.

784 **Supplementary Figure 4: Additional real-time metabolomics data.**

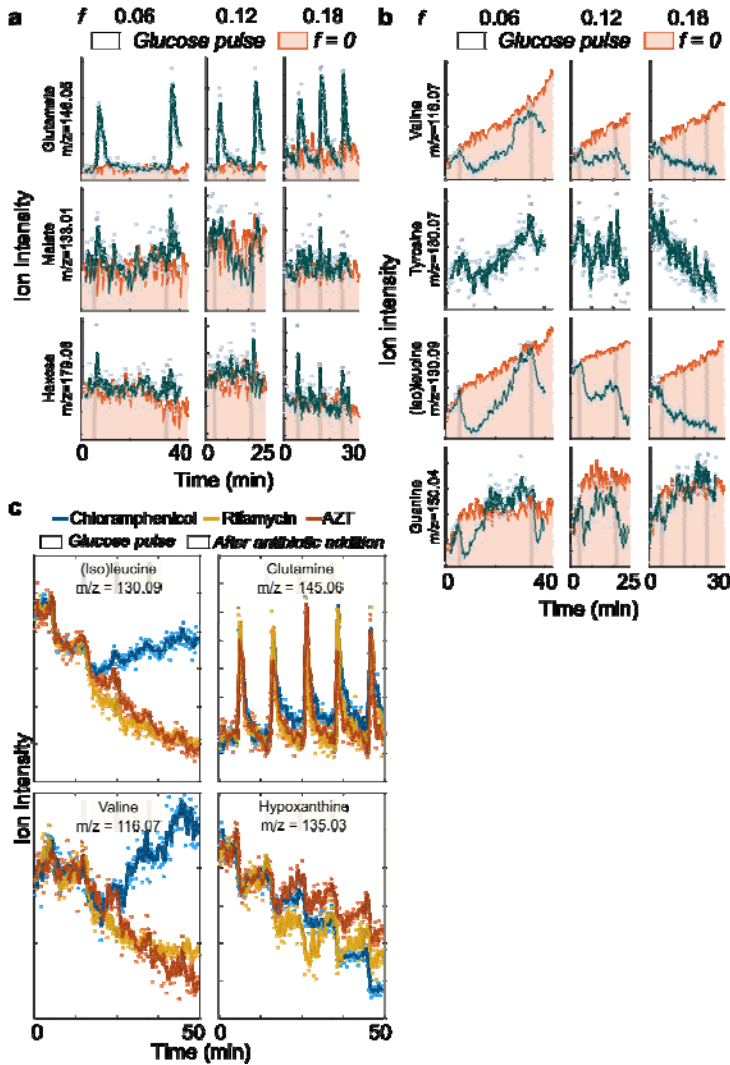

785

786 **a**, Other central metabolites exhibited concentration spikes with glucose pulses at non-  
 787 division TI feedrates ( $f = 0.06, 0.12,$  and  $0.18$  mmol/g/h). The TI feedrate is abbreviated as  $f$   
 788 (units: mmol glucose/g dry cell weight/hour). Glucose pulses are indicated by the grey bars,  
 789 and the pink region shows a no pulse control. Dots are ion intensity measurements. Solid lines  
 790 are a moving average filter of the measured ion intensity **b**, Accumulated valine, tyrosine,  
 791 (iso)leucine, and guanine depleted and recovered after pulse occurrence suggesting protein  
 792 and nucleic synthesis. **c**, Other amino acids and hypoxanthine were affected by corresponding  
 793 antibiotics ( $f = 0.18$  mmol/g/h). Antibiotics were added one minute after the second pulse  
 794 (yellow region). Chloramphenicol (blue) inhibits protein biosynthesis, rifamycin (orange)  
 795 inhibits RNA polymerase, and azidothymidine (AZT; red) inhibits DNA synthesis. The ion  
 796 for tyrosine could not be annotated for the  $f = 0$  mmol/g/h measurement.

797

798 **Supplementary Figure 5: Antibiotic metabolomics data with no antibiotic control.**

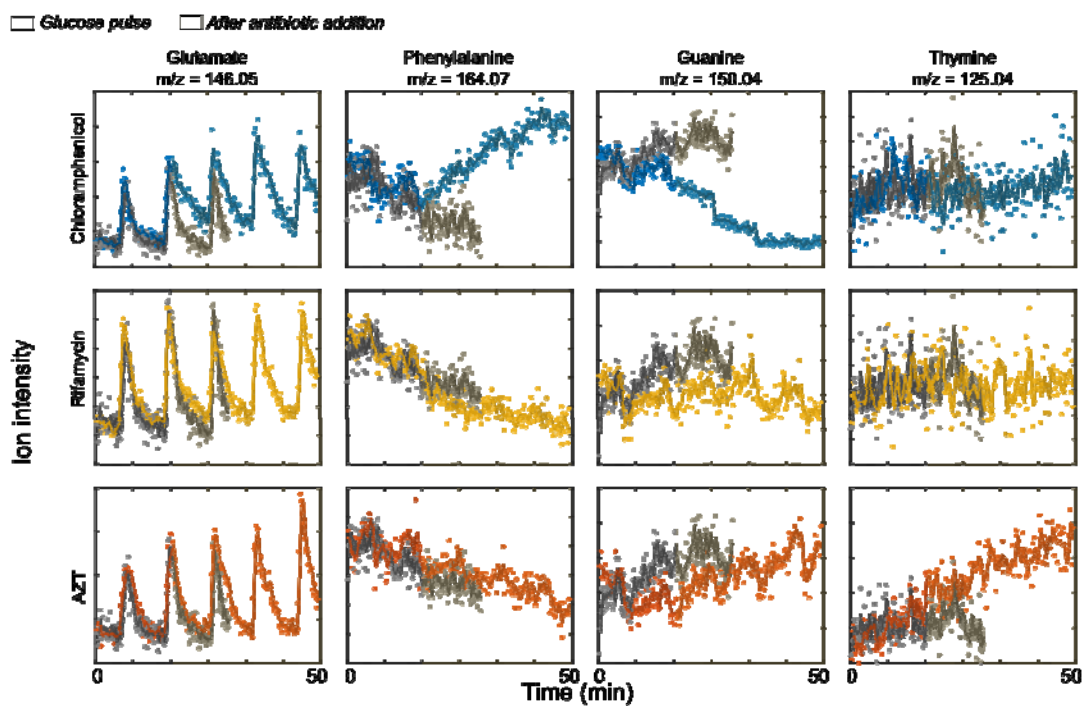

799

800 Data from Fig 4c is plotted against the no antibiotic control condition ( $f = 0.18$  mmol/g/h from  
801 Fig 4a). Black dots indicate the ion intensity for the no antibiotic condition and the solid lines  
802 indicate the moving average filter of the ion intensity.

803 **Supplementary Figure 6: All cells make protein and increase in size with glucose feed.**

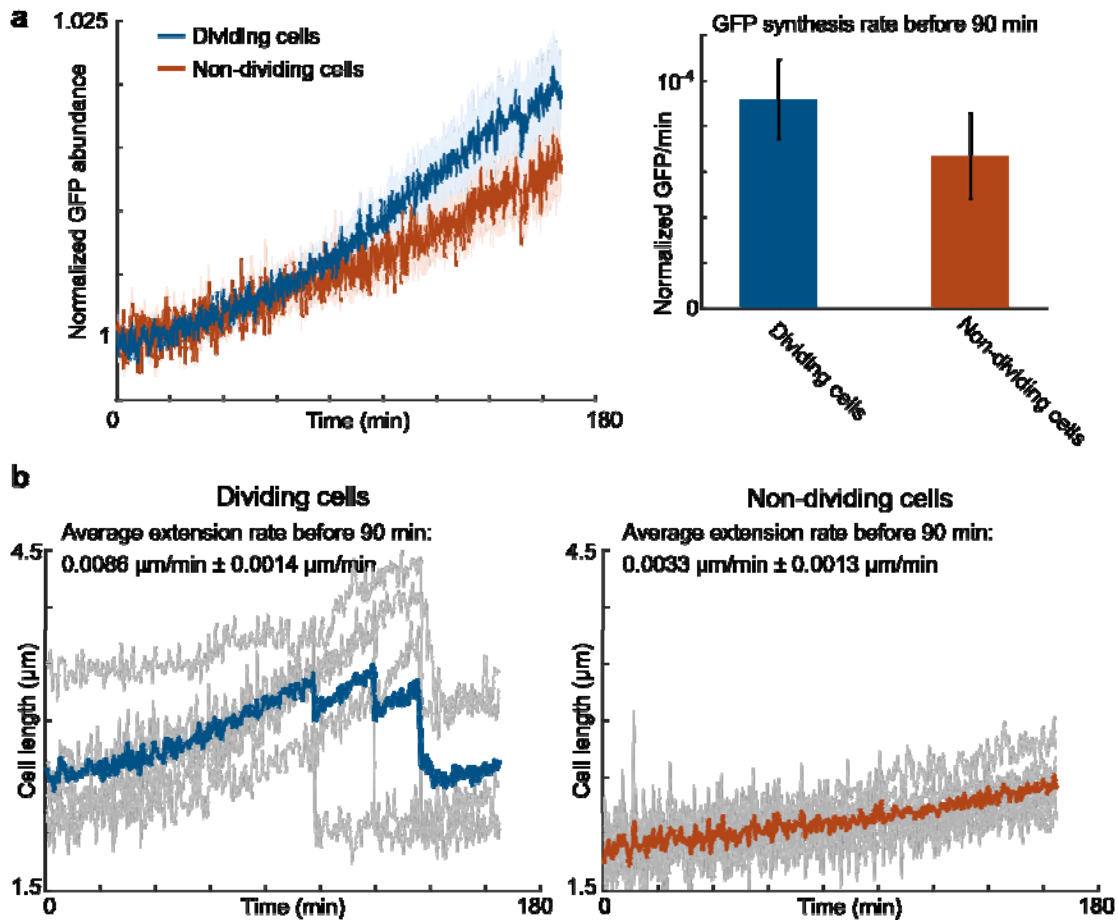

804

805 Cell length and GFP expression was measured using the microfluidic-based microscopy  
806 platform for glucose pulsing periods of 4 minutes. Two groups were determined: a dividing  
807 group (blue), where cells divided within the given experiment time (5 h), and a non-dividing  
808 group (red), where the cells did not divide within the 5 h. **a**, Both dividing and non-dividing  
809 cells made protein as indicated by signal from constitutive GFP expression. Solid lines  
810 indicate the moving average for each given group. Lightly shaded regions indicate average  $\pm$   
811 standard error of the cells ( $n = 5$ ). GFP synthesis rate was calculated before division ( $\sim 90$   
812 min) by using linear fitting. The bar graph shows the GFP synthesis rate for the both dividing  
813 and non-dividing cells. Values are mean  $\pm$  standard error of independent cells ( $n = 5$ ). **b**, Cell  
814 length increased with pulsing in both the dividing versus non-dividing subpopulation. Solid  
815 lines (blue and red) indicate the average of the individual cells. Grey lines indicate lengths of  
816 individual cells over time. Average cell extension rate before division was calculated using  
817 linear fitting for each cell. Values are mean  $\pm$  standard error of independent cells ( $n = 5$ ).

818 **Supplementary Figure 7: The *crp* and *pdhR* mutant strains have no lag.**

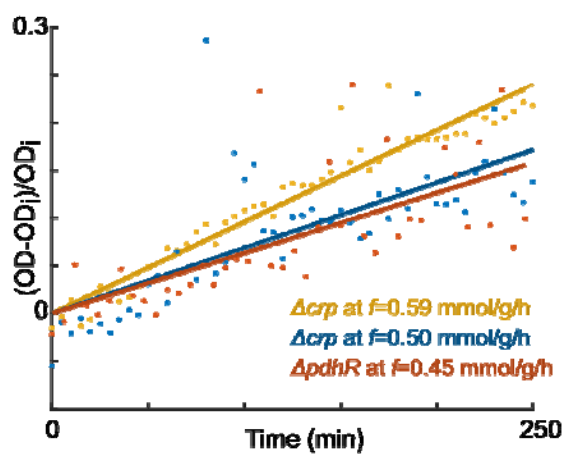

819

820 At normally lag-inducing TI feedrates (Fig 2a), a strain with genetic deletion of *crp* or *pdhR*  
821 showed no lag phase with glucose pulse feeding.

822



823 **Supplementary Figure 8: Western blots validate ClpXP-mediated degradation of FtsZ *in***  
 824 ***in vivo* during starvation and synthesis of FtsZ with glucose pulsing.**

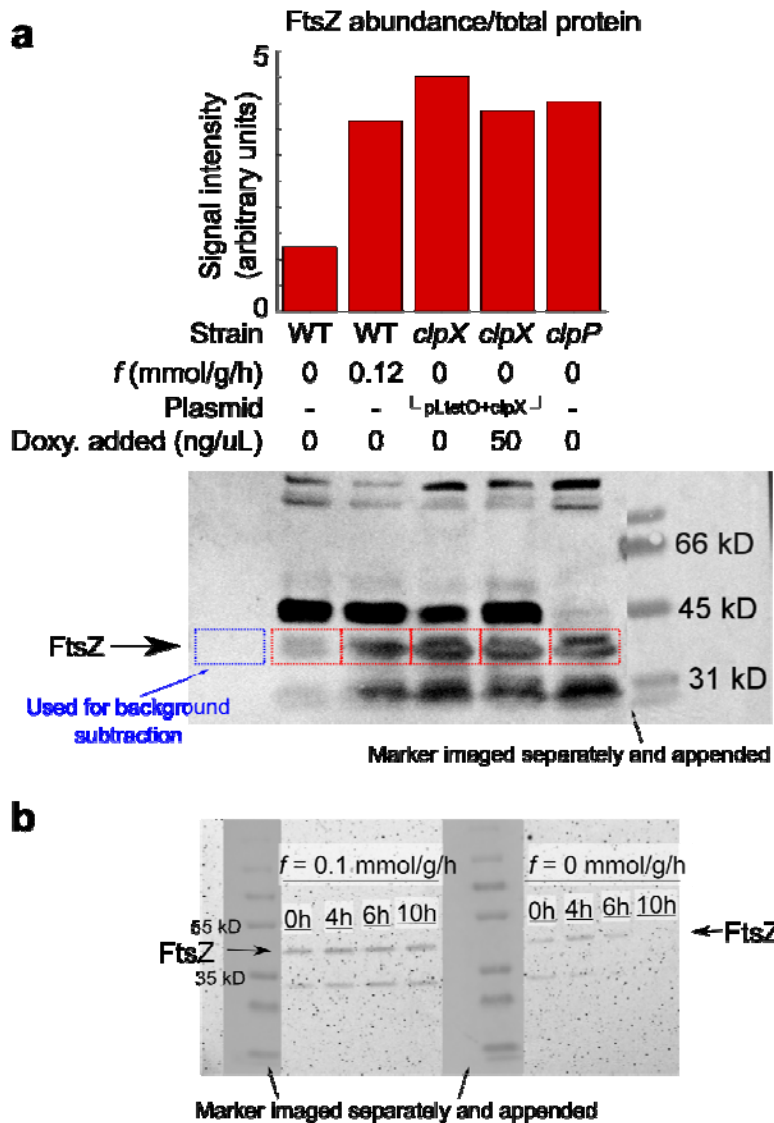

825

826 1.5 ng total protein was loaded into each lane. Protein marker was imaged separately with  
 827 bright-field and appended to blot with exact positioning. (a) After 16 h, relative FtsZ  
 828 abundance (from blot directly below) is much lower in wild-type cells without any glucose  
 829 pulsing ( $f = 0$  mmol/g/h) compared to conditions with glucose pulsing ( $f = 0.12$  mmol/g/h) or  
 830 in strains absent of ClpXP machinery (*clpX* and *clpP*). Supplemental synthesis of ClpX within  
 831 a *clpX* strain via expression off the pLtetO + *clpX* plasmid shows less FtsZ when ClpX  
 832 synthesis is on (50 ng/uL doxycycline added) versus off (0 ng/uL doxycycline). Bordered  
 833 areas were quantified with MATLAB 2015b. The subtracted background is indicated by the  
 834 blue border. (b) A time course immunoblot shows depletion of FtsZ in the no pulse condition  
 835 ( $f = 0$  mmol/g/h) versus the pulsing condition ( $f = 0.1$  mmol/g/h) across 10 h. Time indicates  
 836 sampling points from the beginning of pulsing (2 hours into glucose starvation) for both  
 837 experiments.

838 **Supplementary Figure 9: Titrations of other division proteins support FtsZ as division**  
839 **determinant.**

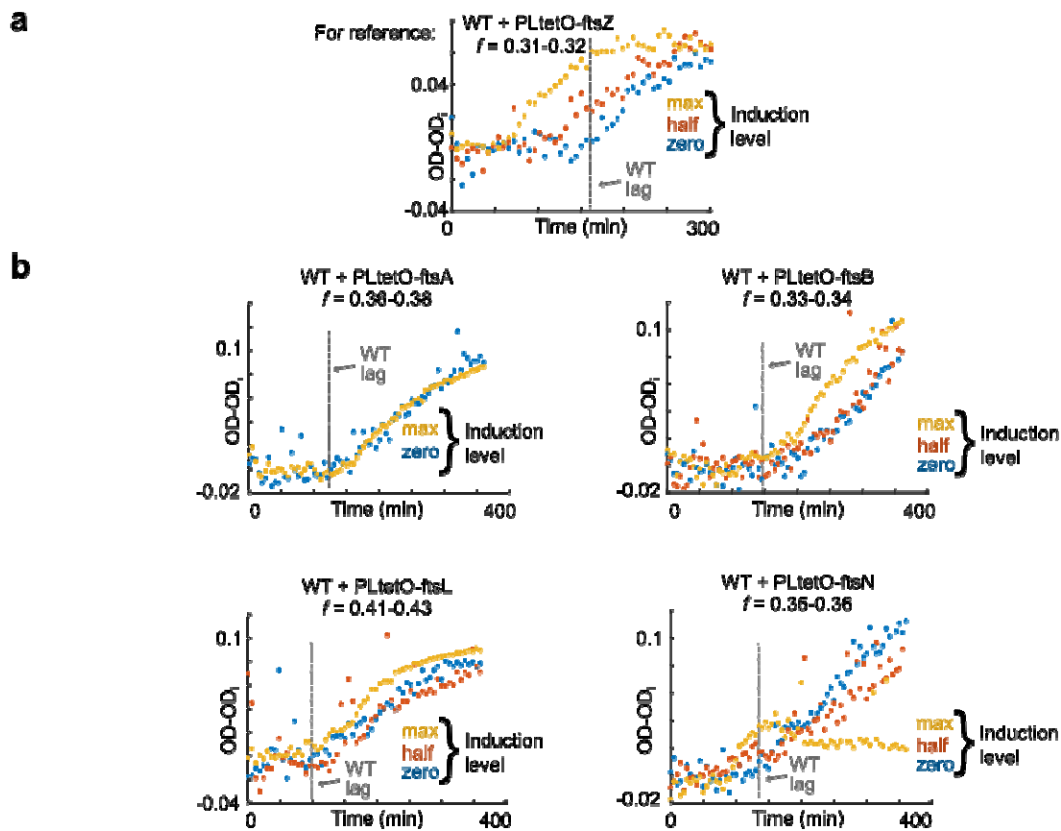

840

841 **a**, Fig 6f is reproduced here as reference and shows the decrease of lag time monotonic to the  
842 FtsZ induction level. Additional protein was titrated via plasmid-based, inducible expression.  
843 For induction, max, half, and zero correspond to addition of 50, 10, and 0 ng/uL of  
844 doxycycline respectively. Units of TI feedrate  $f$  are mmol/g/h. **b**, Lag times do not decrease  
845 with induction level of other division proteins (FtsL, FtsB, and FtsA). FtsB and FtsL  
846 induction minimally increased more division after lag end. Lag time decreases with FtsN  
847 induction, and total division is decreased as shown by the lower final OD.

848 **Supplementary Figure 10: FtsZ-limited division applies for various nutrient limitations.**

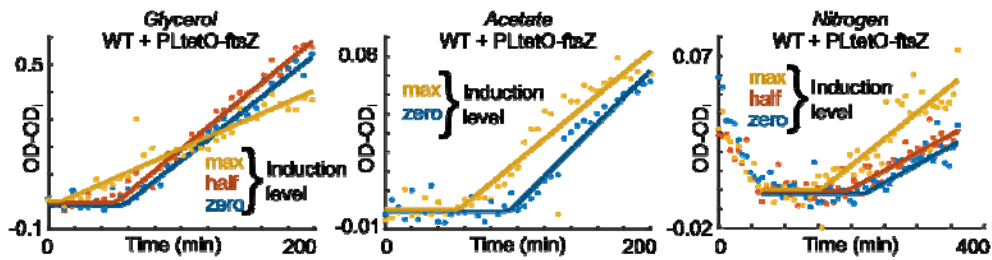

849

850 Supplemental FtsZ titration reduced the lag time in starved cells that were pulse-fed with the  
851 limiting nutrients glycerol, acetate, or ammonium. For induction, max, half, and zero  
852 correspond to addition of 50, 10, and 0 ng/uL of doxycycline respectively. For the glycerol  
853 experiment, cells were grown in glycerol to exponential phase prior to starvation. Pulse  
854 concentration was 38  $\mu\text{M}$  glycerol, and the TI feedrate was 0.6 mmol glycerol/g DCW/hour  
855 where OD 1 corresponds to 0.54 g DCW/L<sup>52</sup>. For the acetate experiment, cells were grown on  
856 acetate as the sole carbon source prior to starvation and pulse feeding. Pulse concentration  
857 was 88  $\mu\text{M}$  sodium acetate at a TI feedrate of 3.0 mmol acetate/g DCW/hour where OD 1  
858 corresponds to 0.44 g DCW/L<sup>52</sup>. For the ammonium experiment, cells were grown in M9  
859 glucose media, then starved in media without ammonium, and consequently pulse fed. Pulse  
860 concentrations were 1.5  $\mu\text{M}$  ammonium sulfate, and the TI feedrate was 0.045 mmol  
861 ammonium sulfate/g DCW/h.

862

863

864 **Supplementary Figure 11: Titration curve of inducible plasmid with GFP.**

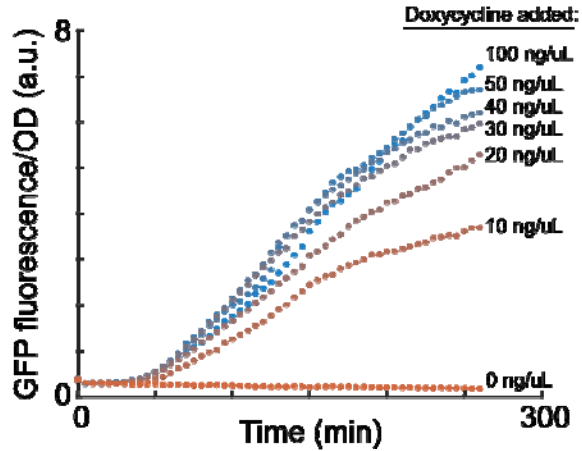

865

866 The parent plasmid pJKR-L-tetR<sup>45</sup> was used to determine the appropriate induction level for  
867 all titration experiments. GFP expression is driven by the titratable pLtetO promoter.  
868 Normalized GFP levels are shown for different levels of inducer doxycycline over time for  
869 microplate cultivations. Time at 0 indicates the addition of doxycycline and start of plate  
870 reader measurement. For titration experiments, 50 ng/uL was selected as high, 10 ng/uL as  
871 half, and 0 ng/uL as zero expression.

872 **Supplementary Table 2. Summary information for wild-type pulse feed experiments**

| Calculated TI       |                | Initial OD | Lag time from fit (min) | Threshold linear fit R <sup>2</sup> | Linear growth rate after lag (1/h) | Pulse freq. <sup>†</sup> (minutes) | Total glucose fed during lag (mmol/g) |
|---------------------|----------------|------------|-------------------------|-------------------------------------|------------------------------------|------------------------------------|---------------------------------------|
| Feedrate (mmol/g/h) | Pulsing system |            |                         |                                     |                                    |                                    |                                       |
| 0.215               | Plate reader   | 0.70       | 260.16                  | 0.607                               | 0.021                              | 9.98                               | 0.93                                  |
| 0.248               | Spin flask     | 0.79       | 270.00                  | 0.852                               | 0.021                              | 7.67                               | 1.11                                  |
| 0.319               | Plate reader   | 0.78       | 152.81                  | 0.974                               | 0.030                              | 5.99                               | 0.81                                  |
| 0.337               | Spin flask     | 1.11       | 113.97                  | 0.882                               | 0.025                              | 4.00                               | 0.64                                  |
| 0.371               | Plate reader   | 0.74       | 121.00                  | 0.965                               | 0.039                              | 5.49                               | 0.75                                  |
| 0.400               | Plate reader   | 0.75       | 101.02                  | 0.976                               | 0.038                              | 4.99                               | 0.67                                  |
| 0.453               | Plate reader   | 0.78       | 56.28                   | 0.985                               | 0.038                              | 4.24                               | 0.43                                  |
| 0.476               | Spin flask     | 0.74       | 93.89                   | 0.955                               | 0.030                              | 4.25                               | 0.75                                  |
| 0.526               | Spin flask     | 0.88       | 81.85                   | 0.938                               | 0.032                              | 4.17                               | 0.72                                  |
| 0.563               | Plate reader   | 0.74       | 49.22                   | 0.967                               | 0.039                              | 3.49                               | 0.48                                  |
| 0.605               | Spin flask     | 0.83       | 67.86                   | 0.987                               | 0.044                              | 3.00                               | 0.68                                  |
| 0.648               | Spin flask     | 0.92       | 55.00                   | 0.996                               | 0.045                              | 2.50                               | 0.59                                  |
| 0.699               | Plate reader   | 0.78       | 33.75                   | 0.983                               | 0.066                              | 2.75                               | 0.39                                  |
| 0.782               | Spin flask     | 0.70       | 0.00                    | 0.963                               | 0.044                              | 2.76                               | 0.00                                  |
| 0.883               | Spin flask     | 0.85       | 30.00                   | 0.970                               | 0.048                              | 2.00                               | 0.44                                  |
| 1.026               | Plate reader   | 0.63       | 0.00                    | 0.961                               | 0.082                              | 2.31                               | 0.00                                  |
| 1.187               | Spin flask     | 0.82       | 0.00                    | 0.914                               | 0.041                              | 1.67                               | 0.00                                  |
| 1.237               | Spin flask     | 0.69       | 0.00                    | 0.962                               | 0.059                              | 1.75                               | 0.00                                  |

873

874 For the units, mmol is mmol of glucose, and g is grams dry cell weight of *E. coli*. Source data  
875 for this table is available in [Supplementary Data 2](#).

876

877 **Supplementary Table 3. C<sup>13</sup> Labeled fraction of measured amino acids and glycogen in**  
878 **washed, hydrolyzed extract**

| Compound [% of native carbons in fragment]                | Fraction of [+X] fragment ( <i>n</i> = 3, biological) at given TI feedrate |                   |                 |                   |
|-----------------------------------------------------------|----------------------------------------------------------------------------|-------------------|-----------------|-------------------|
|                                                           | 0 mmol/g/h                                                                 | 0.06 mmol/g/h     | 0.12 mmol/g/h   | 0.18 mmol/g/h     |
| <i>Class 1<sup>*</sup> - Non-accumulating amino acids</i> |                                                                            |                   |                 |                   |
| Alanine [3]                                               | 0.002 ± 0.002                                                              | 0.025 ± 0.003     | 0.058 ± 0.007   | 0.060 ± 0.003     |
| Aspartate [4]                                             | 0 ± 0                                                                      | 0.014 ± 0.001     | 0.038 ± 0.001   | 0.060 ± 0.003     |
| Glutamate [5]                                             | 0.0006 ± 0.0001                                                            | 0.017 ± 0.001     | 0.039 ± 0.001   | 0.065 ± 0.002     |
| Glycine [2]                                               | 0.0013 ± 0.0007                                                            | 0.022 ± 0.001     | 0.04 ± 0.01     | 0.070 ± 0.003     |
| Proline [4]                                               | 0.0005 ± 0.0003                                                            | 0.0061 ± 0.0002   | 0.013 ± 0.001   | 0.018 ± 0.001     |
| Serine [2]                                                | 0.001 ± 0.001                                                              | 0.026 ± 0.002     | 0.039 ± 0.006   | 0.057 ± 0.002     |
| Threonine [4]                                             | 0 ± 0                                                                      | 0.008 ± 0.001     | 0.022 ± 0.002   | 0.039 ± 0.004     |
| <i>Class 2<sup>*</sup> - Accumulating amino acids</i>     |                                                                            |                   |                 |                   |
| Isoleucine [5]                                            | 0.003 ± 0.001                                                              | 0.003 ± 0.001     | 0.006 ± 0.003   | 0.00013 ± 0.00001 |
| Leucine [6]                                               | [+6] not detected                                                          |                   |                 |                   |
| Lysine [5]                                                | [+5] not detected                                                          |                   |                 |                   |
| Methionine [4]                                            | [+4] not detected                                                          |                   |                 |                   |
| Phenylalanine [8]                                         | [+8] not detected                                                          |                   |                 |                   |
| Tyrosine [9]                                              | [+9] not detected                                                          |                   |                 |                   |
| Valine [4]                                                | 0.002 ± 0.001                                                              | 0.0010 ± 0.0002   | 0.002 ± 0.001   | 0.008 ± 0.002     |
| Glycogen [5]                                              | 0.0004 ± 0.0001                                                            | 0.00028 ± 0.00002 | 0.0007 ± 0.0003 |                   |

879

880 All measurements are after 6 hours of pulsing. Values are the mean ± standard error of  
881 independent biological replicates (*n* = 3 for amino acid samples, *n* = 2 for glycogen). <sup>†</sup>Class  
882 designation is from <sup>17</sup>.

883

884

## 885 **Supplementary Information**

- 886     • PDF files
  - 887         ○ **Supplementary Information** – FtsZ model development, parametrization, and
  - 888         analytical solution. Supplementary Figures 12-14. Supplementary Tables 4-6.
  - 889         Supplementary references.
- 890     • Video files
  - 891         ○ **Video 1** – 6 cells recorded during microfluidic single-cell microscopy (pulse
  - 892         every 4 minutes).
- 893     • ZIP files
  - 894         ○ **Supplementary Data 1** – GenBank files for all plasmids used in this study.
  - 895         ○ **Supplementary Data 2** – All code and data used for analysis and figures.
- 896     • Excel files
  - 897         ○ **Supplementary Table 1** – Annotation and ion counts for all metabolomics
  - 898         data.
- 899

### i. Spin flask system

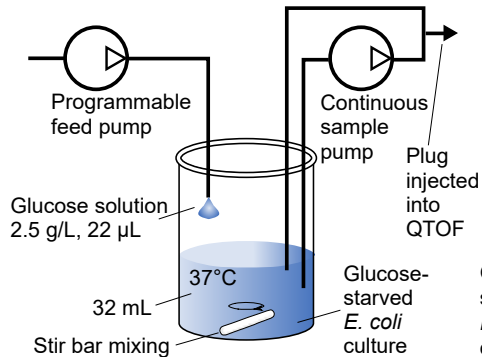

### ii. Plate reader system

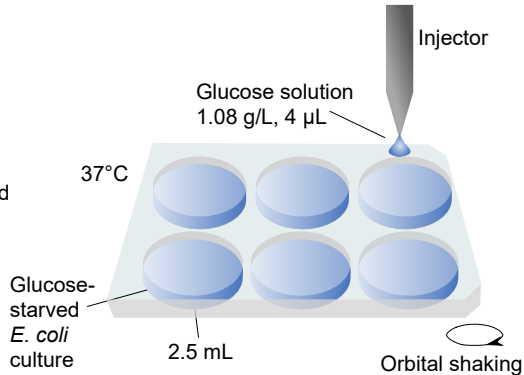

### iii. Microfluidic system

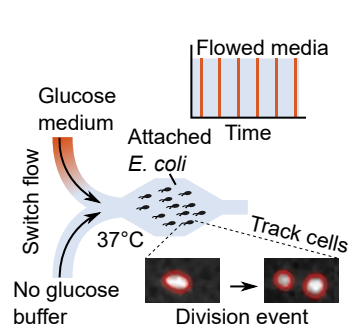

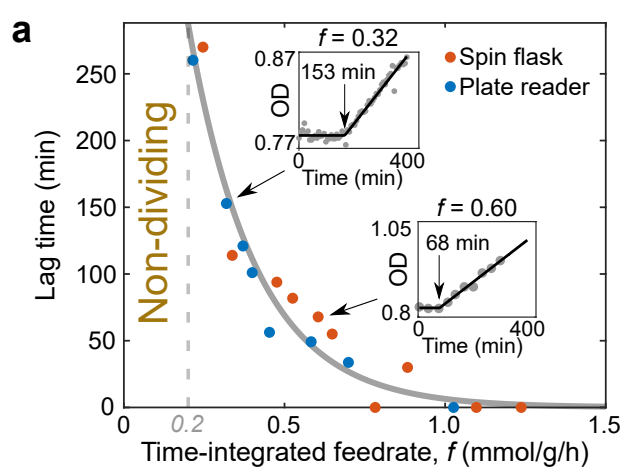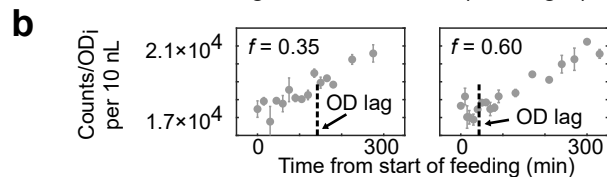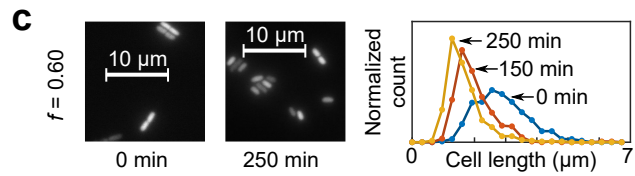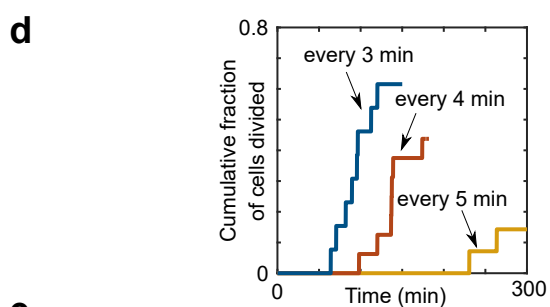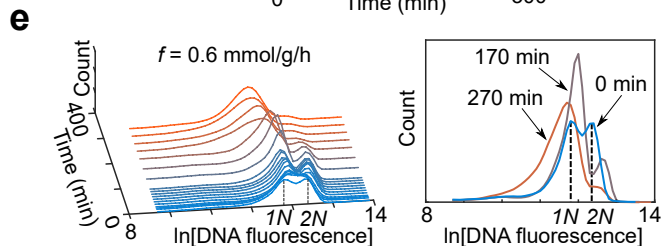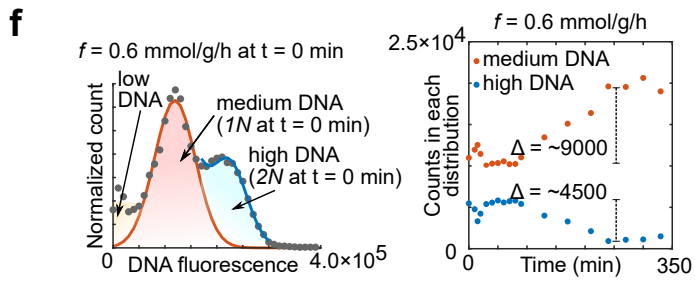



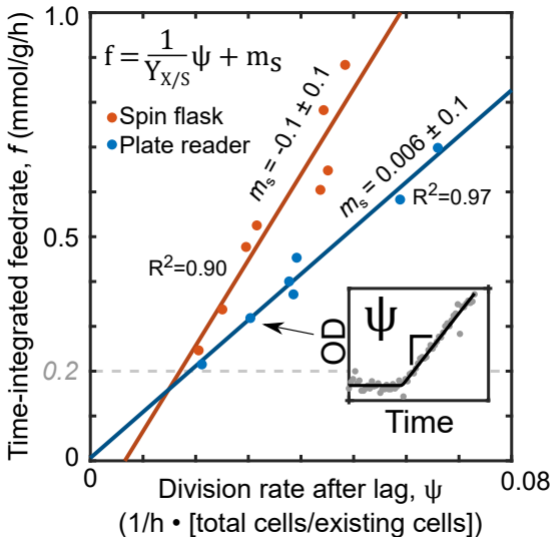

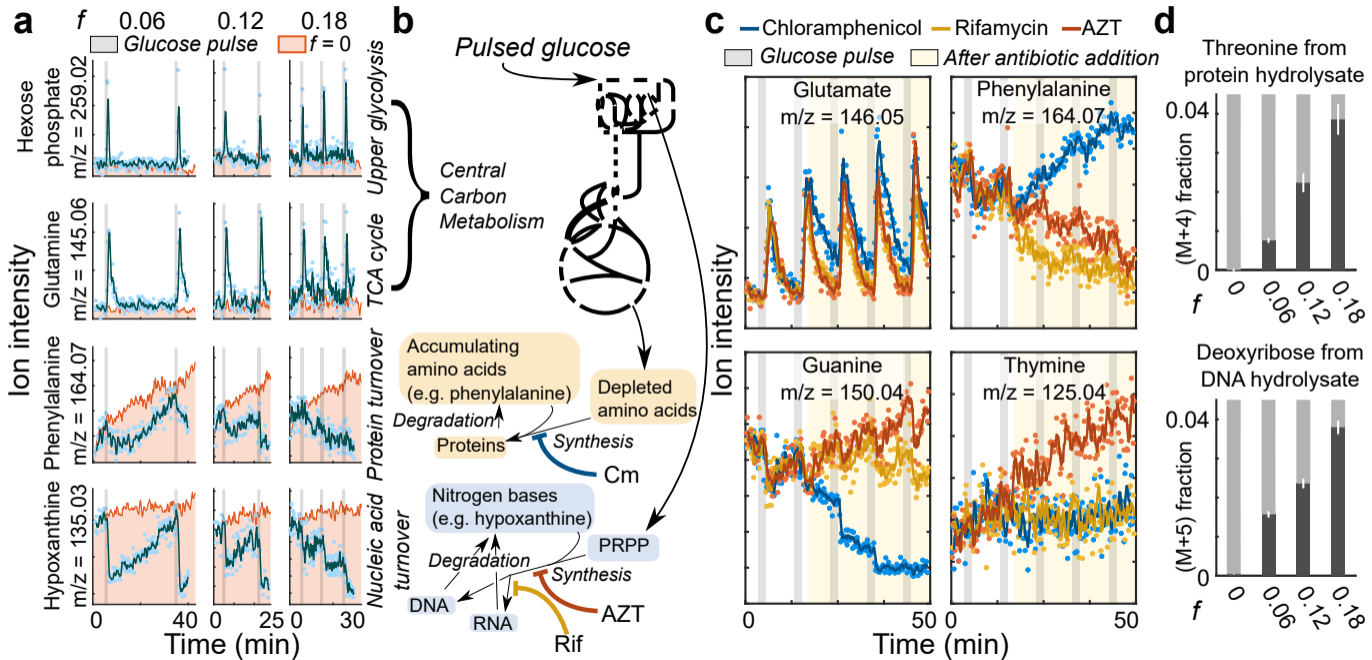

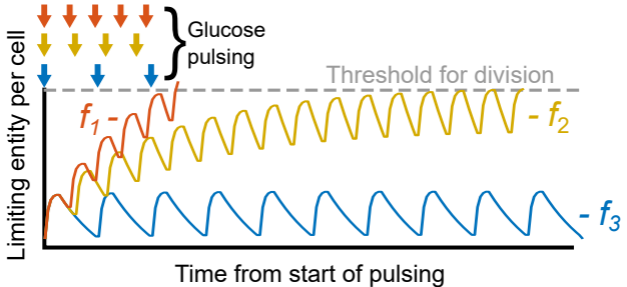

$$f_1 > f_2 > f_3$$

$f_3$  = Critical rate

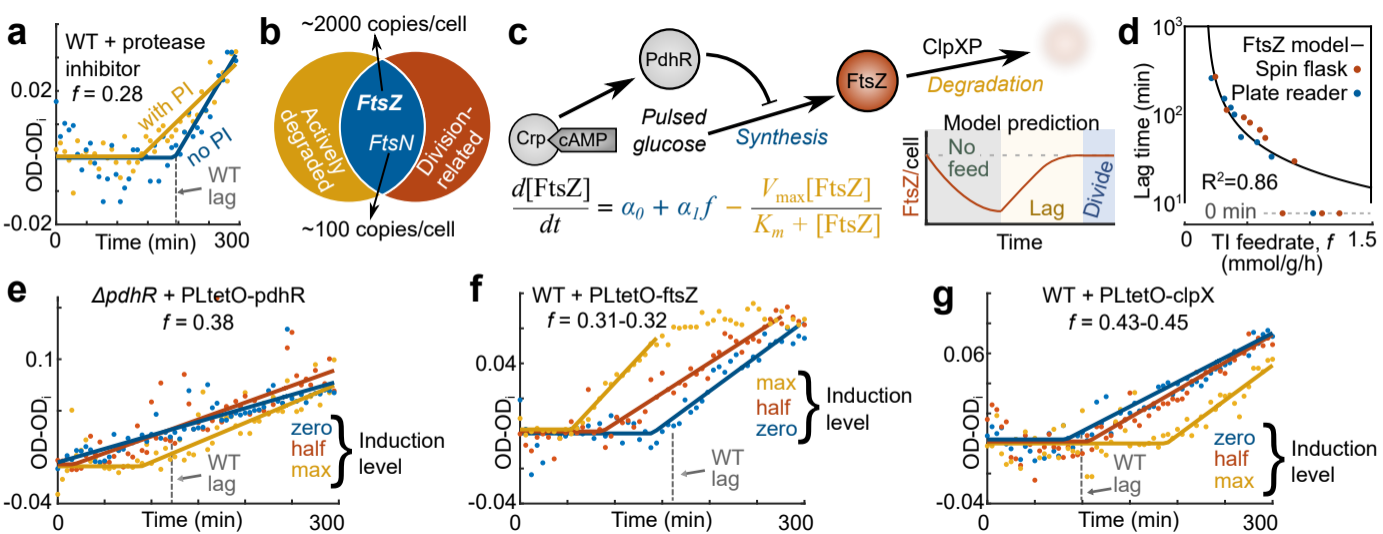

Source: http://biorxiv.org/content/10.1101/314922v1.full.pdf
